# Supplementary material for: Metal-free synthesis of 1,3-dichloro-1,5-diarylpentan-5-ones via cascade oxidative radical addition of styrenes with CHCl3
Source: Royal Society of Chemistry journal article supplement (doi:10.1039/d3ob01403g), 2023-11-14

## *Supporting Information*

# **Metal-free Synthesis of 1,3-Dichloro-1,5-diarylpentan-5-ones via Cascade Oxidative Radical Addition of Styrenes with $\text{CHCl}_3$**

Min Liu<sup>a,b</sup>, Bifu Liu<sup>a,b,\*</sup>, Qian Wang<sup>a</sup>, Kejun Feng<sup>a</sup>, Yuanhua Li<sup>a</sup>, Lixin Liu<sup>a</sup> and Jiaen Tong<sup>a</sup>

a School of Chemistry and Materials Engineering, Huizhou University, Huizhou, 516007, Guangdong, China

b Guangdong Provincial Key Laboratory of Electronic Functional Materials and Devices, Huizhou University, Huizhou 516001, Guangdong, P. R. China

E-mail: liubf@hzu.edu.cn;

### Contents:

|                                                                                             |            |
|---------------------------------------------------------------------------------------------|------------|
| 1. General information                                                                      | Page 2     |
| 2. General experimental procedure for the synthesis of 1,3-Dichloro-1,5-diarylpentan-5-ones | Page 2     |
| 3. Characterization and analytical data of products                                         | Page 2-10  |
| 4. $^1\text{H}$ and $^{13}\text{C}$ -NMR spectrum of products                               | Page 11-33 |

## 1. General information

All the reactions were carried out at room temperature for 24 h in a round-bottom flask equipped with a magnetic stir bar. Unless otherwise stated, all reagents and solvent were purchased from commercial suppliers and used without further purification.  $^1\text{H}$  NMR and  $^{13}\text{C}$  NMR spectra were recorded on a Bruker model Bruker AV-400 spectrometer in solutions of  $\text{CDCl}_3$  using tetramethyl silane as the internal standard;  $\delta$  values are given in ppm, and coupling constants ( $J$ ) in Hz. HR-MS were obtained on a Q-TOF micro spectrometer.

## 2. General experimental procedure for the synthesis of 1,3-Dichloro-1,5-diarylpentan-5-ones

### Typical procedure: 1,3-dichloro-1,5-diphenylpentan-5-one (2a).

A mixture of styrene (1a) (104 mg, 1.0 mmol), TBHP (643 mg, 5.0 mmol, 70% in water),  $\text{CHCl}_3$  (1.0 mL) and  $\text{NEt}_3$  (1.0 mL) were added in a round-bottom flask, and the resulting solution was stirred at 70 °C for 12 h. The mixture was purified by column chromatography on silica gel to afford product **2a** with PE/EA = 20/1 as the eluent.

## 3. Characterization and analytical data of products

### 1,3-dichloro-1,5-diphenylpentan-5-one (2a)

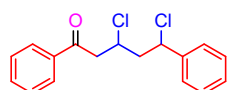

Yield: 78%, *d.r* > 20:1; Pale yellow oil;  $^1\text{H}$  NMR ( $\text{CDCl}_3$ , 400 Hz)  $\delta$  7.90 (d,  $J$  = 7.2Hz, 2H), 7.56 (t,  $J$  = 7.2Hz, 1H), 7.44 (t,  $J$  = 7.2Hz, 2H), 7.34 (t,  $J$  = 7.2Hz, 2H), 7.26 (m, 3H), 5.30 (dd,  $J$  = 10.0Hz,  $J$  = 3.6Hz, 1H), 3.71 (m, 1H), 3.31 (m, 2H), 2.67 (m, 1H), 2.53 (m, 1H);  $^{13}\text{C}$  NMR ( $\text{CDCl}_3$ , 100 Hz)  $\delta$  197.6, 141.6, 136.8, 133.2, 129.0, 128.6, 128.0, 127.5, 127.2, 71.6, 49.6, 44.9, 38.6; HRMS (ESI): calcd for  $\text{C}_{17}\text{H}_{17}\text{Cl}_2\text{O}$ :  $[\text{M}+\text{H}^+]$  307.0651, found 307.0667.

### 1,3-dichloro-1,5-bis(4-methoxyphenyl)pentan-5-one (2b)

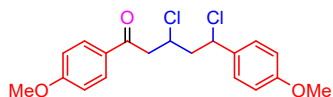

Yield: 77%, *d.r* > 20:1; Pale yellow oil;  $^1\text{H NMR}$  ( $\text{CDCl}_3$ , 400 Hz)  $\delta$  7.88 (d,  $J = 8.4$  Hz, 2H), 7.18 (d,  $J = 8.4$  Hz, 2H), 6.91 (d,  $J = 8.4$  Hz, 2H), 6.86 (d,  $J = 8.4$  Hz, 2H), 5.29 (dd,  $J = 10.0$  Hz,  $J = 3.6$  Hz, 1H), 3.86 (s, 3H), 3.79 (s, 3H), 3.62 (m, 1H), 3.25 (m, 2H), 2.64 (m, 1H), 2.48 (m, 1H);  $^{13}\text{C NMR}$  ( $\text{CDCl}_3$ , 100 Hz)  $\delta$  196.3, 163.5, 158.6, 133.6, 130.3, 129.9, 128.5, 114.3, 113.7, 71.8, 55.4, 55.2, 49.8, 44.8, 38.1; HRMS (ESI): calcd for  $\text{C}_{19}\text{H}_{21}\text{Cl}_2\text{O}_3$ :  $[\text{M}+\text{H}^+]$  367.0862, found 367.0865.

### 1,3-dichloro-1,5-bis(4-ethoxyphenyl)pentan-5-one (2c)

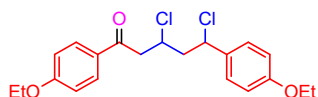

Yield: 81%, *d.r* > 20:1; Pale yellow oil;  $^1\text{H NMR}$  ( $\text{CDCl}_3$ , 400 Hz)  $\delta$  7.88 (d,  $J = 8.4$  Hz, 2H), 7.17 (d,  $J = 8.4$  Hz, 2H), 6.89 (d,  $J = 8.4$  Hz, 2H), 6.84 (d,  $J = 8.4$  Hz, 2H), 5.29 (dd,  $J = 10.0$  Hz,  $J = 3.6$  Hz, 1H), 4.10 (q,  $J = 7.2$  Hz, 2H), 4.00 (q,  $J = 7.2$  Hz, 2H), 3.63 (m, 1H), 3.23 (m, 2H), 2.64 (m, 1H), 2.46 (m, 1H), 1.42 (m, 6H);  $^{13}\text{C NMR}$  ( $\text{CDCl}_3$ , 100 Hz)  $\delta$  196.1, 162.9, 157.8, 138.4, 130.3, 129.7, 128.5, 114.8, 114.1, 71.8, 63.7, 63.4, 49.8, 44.8, 38.1, 14.8, 14.6; HRMS (ESI): calcd for  $\text{C}_{21}\text{H}_{25}\text{Cl}_2\text{O}_3$ :  $[\text{M}+\text{H}^+]$  395.1175, found 395.1171.

### 1,5-bis(4-tert-butoxyphenyl)-1,3-dichloropentan-5-one (2d)

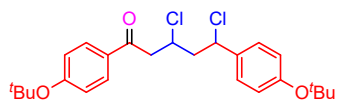

Yield: 76%, *d.r* > 20:1; Pale yellow oil;  $^1\text{H NMR}$  ( $\text{CDCl}_3$ , 400 Hz)  $\delta$  7.83 (d,  $J = 8.4$  Hz, 2H), 7.15 (d,  $J = 8.4$  Hz, 2H), 6.99 (d,  $J = 8.4$  Hz, 2H), 6.93 (d,  $J = 8.4$  Hz, 2H), 5.29 (dd,  $J = 10.0$  Hz,  $J = 3.6$  Hz, 1H), 3.64 (m, 1H), 3.24 (m, 2H), 2.67 (m, 1H), 2.48 (m, 1H), 1.41 (s, 9H), 1.33 (s, 9H);  $^{13}\text{C NMR}$  ( $\text{CDCl}_3$ , 100 Hz)  $\delta$  196.7, 160.5, 154.4, 136.3, 131.4, 129.5, 127.9, 124.4, 122.2, 78.4, 77.3, 71.7, 49.6, 44.8, 38.2, 28.9, 28.8; HRMS (ESI): calcd for  $\text{C}_{25}\text{H}_{33}\text{Cl}_2\text{O}_3$ :  $[\text{M}+\text{H}^+]$  451.1801, found 451.1807.

### 1,3-dichloro-1,5-dip-tolylpentan-5-one (2e)

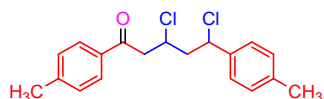

Yield: 80%, *d.r* > 20:1; Pale yellow oil; <sup>1</sup>H NMR (CDCl<sub>3</sub>, 400 Hz) δ 7.28 (d, *J* = 8.4 Hz, 2H), 7.24 (d, *J* = 8.4 Hz, 2H), 7.16 (m, 4H), 5.30 (dd, *J* = 10.0 Hz, *J* = 3.6 Hz, 1H), 3.65 (m, 1H), 3.25 (m, 2H), 2.66 (m, 1H), 2.50 (m, 1H), 2.41 (s, 3H), 2.33 (s, 3H); <sup>13</sup>C NMR (CDCl<sub>3</sub>, 100 Hz) δ 197.3, 144.0, 138.6, 136.8, 134.3, 129.6, 129.3, 128.1, 127.4, 71.8, 49.6, 44.9, 38.3, 21.6, 21.0; HRMS (ESI): calcd for C<sub>19</sub>H<sub>21</sub>Cl<sub>2</sub>O: [M+H<sup>+</sup>] 335.0964, found 335.0977.

### 1,5-bis(4-tert-butylphenyl)-1,3-dichloropentan-5-one (2f)

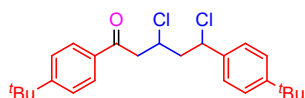

Yield: 75%, *d.r* > 20:1; Pale yellow oil; <sup>1</sup>H NMR (CDCl<sub>3</sub>, 400 Hz) δ 7.86 (d, *J* = 8.4 Hz, 2H), 7.45 (d, *J* = 8.8 Hz, 2H), 7.34 (d, *J* = 8.4 Hz, 2H), 7.20 (d, *J* = 8.4 Hz, 2H), 5.31 (dd, *J* = 10.0 Hz, *J* = 3.6 Hz, 1H), 3.67 (m, 1H), 3.29 (m, 2H), 2.67 (m, 1H), 2.51 (m, 1H), 1.34 (s, 9H), 1.31 (s, 9H); <sup>13</sup>C NMR (CDCl<sub>3</sub>, 100 Hz) δ 197.4, 156.9, 150.0, 138.5, 134.3, 128.0, 127.1, 125.8, 125.5, 71.9, 49.6, 44.9, 38.1, 35.1, 34.4, 31.3, 31.0; HRMS (ESI): calcd for C<sub>25</sub>H<sub>33</sub>Cl<sub>2</sub>O: [M+H<sup>+</sup>] 419.1903, found 419.1906.

### 1,5-bis(4-phenylphenyl)-1,3-dichloropentan-5-one (2g)

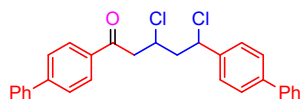

Yield: 82%, *d.r* > 20:1; Pale yellow powder solid; mp: 60-62°C; <sup>1</sup>H NMR (CDCl<sub>3</sub>, 400 Hz) δ 8.00 (d, *J* = 8.4 Hz, 2H), 7.68 (d, *J* = 8.4 Hz, 2H), 7.60 (m, 6H), 7.42 (m, 8H), 5.38 (dd, *J* = 10.0 Hz, *J* = 3.6 Hz, 1H), 3.79 (m, 1H), 3.38 (m, 2H), 2.75 (m, 1H), 2.59 (m, 1H); <sup>13</sup>C NMR (CDCl<sub>3</sub>, 100 Hz) δ 196.9, 145.9, 140.6, 140.5, 140.2, 139.7, 135.4, 128.9, 128.7, 128.6, 128.3, 128.0, 127.7, 127.3, 127.29, 127.26, 127.0, 71.6, 49.6, 45.0, 38.4; HRMS (ESI): calcd for C<sub>29</sub>H<sub>25</sub>Cl<sub>2</sub>O: [M+H<sup>+</sup>] 459.1277, found 459.1263.

### 1,3-dichloro-1,5-bis(4-fluorophenyl)pentan-5-one (2h)

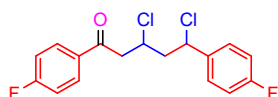

Yield: 66%, *d.r* > 20:1; Pale yellow oil; <sup>1</sup>H NMR (CDCl<sub>3</sub>, 400 Hz) δ 7.91 (dd, *J* = 4.2 Hz, *J* = 8.8 Hz, 2H), 7.25 (dd, *J* = 4.2 Hz, *J* = 8.8 Hz, 2H), 7.12 (t, *J* = 8.8 Hz, 2H), 7.02 (d, *J* = 8.8 Hz, 2H), 5.29 (dd, *J* = 10.0 Hz, *J* = 3.6 Hz, 1H), 3.70 (m, 1H), 3.28 (m, 2H), 2.66 (m, 1H), 2.48 (m, 1H); <sup>13</sup>C NMR (CDCl<sub>3</sub>, 100 Hz) δ 195.7, 165.2 (d, <sup>1</sup>*J*<sub>C-F</sub> = 253.0 Hz), 162.6 (d, <sup>1</sup>*J*<sub>C-F</sub> = 247.0 Hz), 137.1 (d, <sup>4</sup>*J*<sub>C-F</sub> = 3.9 Hz), 133.1 (d, <sup>4</sup>*J*<sub>C-F</sub> = 3.2 Hz), 130.5 (d, <sup>3</sup>*J*<sub>C-F</sub> = 9.1 Hz), 130.5 (d, <sup>3</sup>*J*<sub>C-F</sub> = 8.0 Hz), 115.9 (d, <sup>2</sup>*J*<sub>C-F</sub> = 21.2 Hz), 115.9 (d, <sup>2</sup>*J*<sub>C-F</sub> = 21.8 Hz), 71.3, 49.6, 44.8, 38.0; HRMS (ESI): calcd for C<sub>17</sub>H<sub>15</sub>Cl<sub>2</sub>F<sub>2</sub>O: [M+H<sup>+</sup>] 343.0463, found 343.0481.

### 1,3-dichloro-1,5-bis(4-chlorophenyl)pentan-5-one (2i)

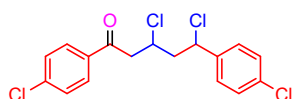

Yield: 70%, *d.r* > 20:1; Pale yellow oil; <sup>1</sup>H NMR (CDCl<sub>3</sub>, 400 Hz) δ 7.84 (d, *J* = 8.4 Hz, 2H), 7.44 (d, *J* = 8.4 Hz, 2H), 7.32 (d, *J* = 8.4 Hz, 2H), 7.23 (d, *J* = 8.4 Hz, 2H), 5.30 (dd, *J* = 10.0 Hz, *J* = 3.6 Hz, 1H), 3.70 (m, 1H), 3.29 (m, 2H), 2.67 (m, 1H), 2.49 (m, 1H); <sup>13</sup>C NMR (CDCl<sub>3</sub>, 100 Hz) δ 196.0, 139.9, 134.9, 133.1, 129.3, 129.2, 129.0, 128.9, 71.2, 49.4, 44.7, 38.0; HRMS (ESI): calcd for C<sub>17</sub>H<sub>15</sub>Cl<sub>4</sub>O: [M+H<sup>+</sup>] 374.9872, found 374.9899.

### 1,5-bis(4-bromophenyl)-1,3-dichloropentan-5-one (2j)

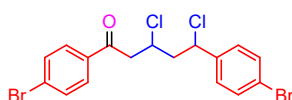

Yield: 77%, *d.r* > 20:1; Pale yellow oil; <sup>1</sup>H NMR (CDCl<sub>3</sub>, 400 Hz) δ 7.75 (d, *J* = 8.8 Hz, 2H), 7.59 (d, *J* = 8.4 Hz, 2H), 7.46 (d, *J* = 8.4 Hz, 2H), 7.15 (d, *J* = 8.4 Hz, 2H), 5.29 (dd, *J* = 10.0 Hz, *J* = 3.6 Hz, 1H), 3.69 (m, 1H), 3.27 (m, 2H), 2.66 (m, 1H), 2.50 (m, 1H); <sup>13</sup>C NMR (CDCl<sub>3</sub>, 100 Hz) δ 196.1, 140.4, 135.3, 132.1, 132.0, 129.4, 129.3, 128.6, 121.2, 71.2, 49.4, 44.6, 38.1; HRMS (ESI): calcd for C<sub>17</sub>H<sub>15</sub>Br<sub>2</sub>Cl<sub>2</sub>O: [M+H<sup>+</sup>] 403.9872, found 403.9899.

[M+H<sup>+</sup>] 462.8861, found 462.8865.

#### 4,4'-(1,3-dichloro-5-oxopentane-1,5-diyl)dibenzonitrile (2k)

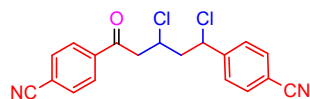

Yield: 47%, *d.r* > 20:1; <sup>1</sup>H NMR (400 MHz, CDCl<sub>3</sub>) δ 7.99 (d, *J* = 8.4 Hz, 2H), 7.78 (d, *J* = 8.3 Hz, 2H), 7.67 (d, *J* = 8.2 Hz, 2H), 7.44 (d, *J* = 8.2 Hz, 2H), 5.30 (dd, *J* = 9.5, 3.8 Hz, 1H), 3.83 (d, *J* = 7.0 Hz, 1H), 3.39 (dd, *J* = 9.4, 6.9 Hz, 2H), 2.70 (d, *J* = 9.7 Hz, 1H), 2.60 (d, *J* = 10.4 Hz, 1H). <sup>13</sup>C NMR (101 MHz, CDCl<sub>3</sub>) δ 195.37, 146.83, 139.18, 132.89, 132.66, 128.56, 128.36, 118.37, 117.66, 116.90, 111.58, 70.71, 49.03, 44.69, 38.48.

#### 1,3-dichloro-1,5-bis(4-(trifluoromethyl)phenyl)pentan-5-one (2l)

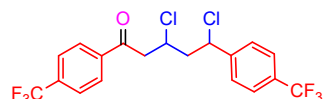

Yield: 43%, *d.r* > 20:1; <sup>1</sup>H NMR (400 MHz, CDCl<sub>3</sub>) δ 8.01 (d, *J* = 8.1 Hz, 2H), 7.74 (d, *J* = 8.2 Hz, 2H), 7.63 (d, *J* = 8.1 Hz, 2H), 7.44 (d, *J* = 8.1 Hz, 2H), 5.31 (dd, *J* = 9.8, 3.7 Hz, 1H), 3.88 – 3.80 (m, 1H), 3.45 (dd, *J* = 17.5, 7.3 Hz, 1H), 3.36 (dd, *J* = 17.5, 6.6 Hz, 1H), 2.73 (ddd, *J* = 14.2, 9.8, 4.4 Hz, 1H), 2.60 (ddd, *J* = 14.3, 10.7, 3.7 Hz, 1H). <sup>13</sup>C NMR (101 MHz, CDCl<sub>3</sub>) δ 196.01, 145.49, 139.11, 135.26, 134.93, 134.61, 134.28, 130.30, 129.97, 129.65, 129.32, 128.29, 128.05, 126.11, 126.07, 126.03, 126.00, 125.87, 125.84, 125.80, 125.76, 125.29, 124.81, 122.59, 122.10, 70.97, 49.28, 44.90, 38.35.

#### 1,3-dichloro-1,5-bis(3-methoxyphenyl)pentan-5-one (2m)

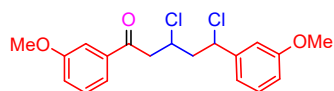

Yield: 84%, *d.r* > 20:1; Pale yellow oil; <sup>1</sup>H NMR (CDCl<sub>3</sub>, 400 Hz) δ 7.48 (m, 2H), 7.35 (t, *J* = 8.0 Hz, 1H), 7.26 (t, *J* = 8.0 Hz, 1H), 7.11 (m, 1H), 8.78 (m, 3H), 5.32 (dd, *J* = 10.0 Hz, *J* = 3.2 Hz, 1H), 3.84 (s, 3H), 3.81 (s, 3H), 3.327 (m, 2H), 2.67 (m, 1H), 2.51 (m, 1H); <sup>13</sup>C NMR (CDCl<sub>3</sub>, 100 Hz) δ 197.4, 159.9, 159.7, 143.2, 138.1, 130.0,

129.6, 120.6, 119.8, 119.7, 113.7, 112.2, 71.6, 55.4, 55.2, 49.5, 44.9, 38.7; HRMS (ESI): calcd for C<sub>19</sub>H<sub>21</sub>Cl<sub>2</sub>O<sub>3</sub>: [M+H<sup>+</sup>] 367.0862, found 367.0869.

### 1,3-dichloro-1,5-dim-tolylpentan-5-one (2n)

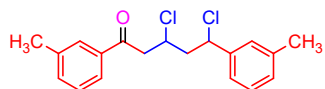

Yield: 82%, *d.r* > 20:1; Pale yellow oil; <sup>1</sup>H NMR (CDCl<sub>3</sub>, 400 Hz) δ 7.71 (m, 2H), 7.35 (m, 2H), 7.22 (m, 2H), 7.06 (br, 3H), 5.32 (dd, *J* = 10.0 Hz, *J* = 3.2 Hz, 1H), 3.66 (m, 1H), 3.32 (m, 2H), 2.67 (m, 1H), 2.51 (m, 1H), 2.40 (s, 3H), 2.35 (s, 3H); <sup>13</sup>C NMR (CDCl<sub>3</sub>, 100 Hz) δ 197.8, 141.6, 138.6, 138.4, 136.8, 133.9, 128.8, 128.5, 128.4, 128.3, 128.0, 125.2, 124.5, 71.7, 49.6, 45.0, 38.6, 21.5, 21.3; HRMS (ESI): calcd for C<sub>19</sub>H<sub>21</sub>Cl<sub>2</sub>O: [M+H<sup>+</sup>] 335.0964, found 335.0969.

### 1,3-dichloro-1,5-bis(3-fluorophenyl)pentan-5-one (2o)

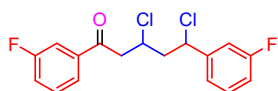

Yield: 68%, *d.r* > 20:1; Pale yellow oil; <sup>1</sup>H NMR (CDCl<sub>3</sub>, 400 Hz) δ 7.68 (m, 1H), 7.57 (m, 1H), 7.43 (m, 1H), 7.29 (m, 1H), 7.25 (m, 1H), 7.07 (m, 1H), 6.97 (m, 2H), 5.31 (dd, *J* = 10.0 Hz, *J* = 3.6 Hz, 1H), 3.72 (m, 1H), 3.31 (m, 2H), 2.66 (m, 1H), 2.49 (m, 1H); <sup>13</sup>C NMR (CDCl<sub>3</sub>, 100 Hz) δ 195.8, 162.9 (d, <sup>1</sup>*J*<sub>C-F</sub> = 254.7 Hz), 162.6 (d, <sup>1</sup>*J*<sub>C-F</sub> = 253.8 Hz), 144.0 (d, <sup>3</sup>*J*<sub>C-F</sub> = 6.7 Hz), 138.6 (d, <sup>3</sup>*J*<sub>C-F</sub> = 6.1 Hz), 130.5 (d, <sup>3</sup>*J*<sub>C-F</sub> = 8.2 Hz), 130.3 (d, <sup>3</sup>*J*<sub>C-F</sub> = 7.6 Hz), 123.7 (d, <sup>4</sup>*J*<sub>C-F</sub> = 3.2 Hz), 123.3 (d, <sup>3</sup>*J*<sub>C-F</sub> = 3.8 Hz), 120.4 (d, <sup>2</sup>*J*<sub>C-F</sub> = 21.3 Hz), 114.7 (d, <sup>2</sup>*J*<sub>C-F</sub> = 22.2 Hz), 114.5 (d, <sup>2</sup>*J*<sub>C-F</sub> = 21.2 Hz), 114.6 (d, <sup>2</sup>*J*<sub>C-F</sub> = 20.9 Hz), 71.1, 49.4, 44.8, 38.3; HRMS (ESI): calcd for C<sub>17</sub>H<sub>15</sub>Cl<sub>2</sub>F<sub>2</sub>O: [M+H<sup>+</sup>] 343.0463, found 343.0453.

### 1,3-dichloro-1,5-bis(3-chlorophenyl)pentan-5-one (2p)

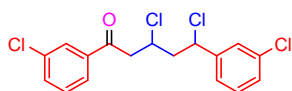

Yield: 73%, *d.r* > 20:1; Pale yellow oil; <sup>1</sup>H NMR (CDCl<sub>3</sub>, 400 Hz) δ 7.86 (m, 1H),

7.67 (m, 1H), 7.54 (m, 1H), 7.41 (m, 1H), 7.25 (m, 3H), 7.18 (m, 1H), 5.31 (dd,  $J = 10.0$  Hz,  $J = 3.6$  Hz, 1H), 3.71 (m, 1H), 3.31 (m, 2H), 2.67 (m, 1H), 2.49 (m, 1H);  $^{13}\text{C}$  NMR ( $\text{CDCl}_3$ , 100 Hz)  $\delta$  195.8, 143.5, 138.1, 135.0, 134.9, 133.3, 130.3, 130.0, 128.1, 127.6, 127.5, 126.0, 71.1, 49.3, 44.7, 38.2; HRMS (ESI): calcd for  $\text{C}_{17}\text{H}_{15}\text{Cl}_4\text{O}$ :  $[\text{M}+\text{H}^+]$  374.9872, found 374.9858.

### 1,5-bis(3-bromophenyl)-1,3-dichloropentan-5-one (2q)

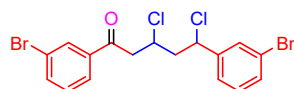

Yield: 71%, *d.r* > 20:1; Pale yellow oil;  $^1\text{H}$  NMR ( $\text{CDCl}_3$ , 400 Hz)  $\delta$  8.01 (t,  $J = 1.6$  Hz, 1H), 7.82 (d,  $J = 8.0$  Hz, 1H), 7.68 (d,  $J = 8.0$  Hz, 1H), 7.40 (m, 2H), 7.34 (t,  $J = 7.6$  Hz, 1H), 7.22 (m, 2H), 5.31 (dd,  $J = 10.0$  Hz,  $J = 3.6$  Hz, 1H), 3.69 (m, 2H), 3.28 (m, 2H), 2.65 (m, 1H), 2.51 (m, 1H);  $^{13}\text{C}$  NMR ( $\text{CDCl}_3$ , 100 Hz)  $\delta$  195.7, 143.8, 138.2, 136.2, 130.62, 130.60, 130.4, 130.3, 126.5, 126.4, 123.1, 123.0, 71.1, 49.3, 44.7, 38.2; HRMS (ESI): calcd for  $\text{C}_{17}\text{H}_{15}\text{Br}_2\text{Cl}_2\text{O}$ :  $[\text{M}+\text{H}^+]$  462.8861, found 462.8874.

### 1,3-dichloro-1,5-bis(2-fluorophenyl)pentan-5-one (2r)

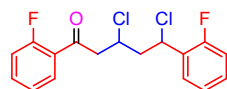

Yield: 71%, *d.r* > 20:1; Colorless powder solid; mp: 58-60°C;  $^1\text{H}$  NMR ( $\text{CDCl}_3$ , 400 Hz)  $\delta$  7.79 (m, 1H), 7.52 (m, 1H), 7.24 (m, 3H), 7.08 (m, 3H), 5.37 (dd,  $J = 9.6$  Hz,  $J = 4.0$  Hz, 1H), 3.89 (m, 1H), 3.43 (m, 2H), 2.70 (m, 2H);  $^{13}\text{C}$  NMR ( $\text{CDCl}_3$ , 100 Hz)  $\delta$  195.8, 162.7 (d,  $^1J_{\text{C-F}} = 254.0$  Hz), 160.2 (d,  $^1J_{\text{C-F}} = 253.8$  Hz), 134.7 (d,  $^3J_{\text{C-F}} = 9.1$  Hz), 130.6 (d,  $^4J_{\text{C-F}} = 2.5$  Hz), 130.3 (d,  $^3J_{\text{C-F}} = 5.2$  Hz), 128.8 (d,  $^3J_{\text{C-F}} = 8.4$  Hz), 128.0 (d,  $^2J_{\text{C-F}} = 16.4$  Hz), 125.3 (d,  $^2J_{\text{C-F}} = 18.2$  Hz), 124.5 (d,  $^4J_{\text{C-F}} = 3.3$  Hz), 124.4 (d,  $^4J_{\text{C-F}} = 3.5$  Hz), 116.6 (d,  $^2J_{\text{C-F}} = 22.8$  Hz), 116.1 (d,  $^2J_{\text{C-F}} = 21.2$  Hz), 71.6, 48.1, 47.9, 34.3; HRMS (ESI): calcd for  $\text{C}_{17}\text{H}_{15}\text{Cl}_2\text{F}_2\text{O}$ :  $[\text{M}+\text{H}^+]$  343.0463, found 343.0466.

### 1,3-dichloro-1,5-bis(2-chlorophenyl)pentan-5-one (2s)

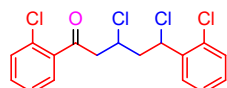



Yield: 63%, *d.r* > 20:1; Pale yellow oil;  $^1\text{H}$  NMR ( $\text{CDCl}_3$ , 400 Hz)  $\delta$  7.38 (m, 3H), 7.24 (m, 1H), 7.41 (m, 5H), 5.44 (dd,  $J = 8.8$  Hz,  $J = 4.8$  Hz, 1H), 4.14 (m, 1H), 3.38 (d,  $J = 7.2$  Hz, 2H), 2.71 (m, 2H);  $^{13}\text{C}$  NMR ( $\text{CDCl}_3$ , 100 Hz)  $\delta$  200.7, 138.9, 138.4, 134.0, 131.8, 130.49, 130.44, 130.1, 128.9, 128.4, 127.3, 126.9, 71.2, 47.9, 47.7, 36.2; HRMS (ESI): calcd for  $\text{C}_{17}\text{H}_{15}\text{Cl}_4\text{O}$ :  $[\text{M}+\text{H}^+]$  374.9872, found 374.9867.

### 1,3-dichloro-1,5-di(naphthalen-3-yl)pentan-5-one (2u)

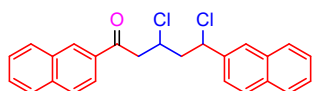

Yield: 80%, *d.r* > 20:1; Pale yellow powder solid; mp: 72-74°C;  $^1\text{H}$  NMR ( $\text{CDCl}_3$ , 400 Hz)  $\delta$  8.42 (s, 1H), 7.97 (m, 2H), 7.86 (m, 5H), 7.77 (s, 1H), 7.51 (m, 5H), 5.34 (dd,  $J = 10.0$  Hz,  $J = 3.6$  Hz, 1H), 3.96 (m, 1H), 3.57 (m, 2H), 2.83 (m, 1H), 2.69 (m, 1H);  $^{13}\text{C}$  NMR ( $\text{CDCl}_3$ , 100 Hz)  $\delta$  197.4, 139.0, 135.6, 134.1, 133.5, 132.6, 132.4, 129.7, 129.5, 128.9, 128.5, 128.4, 127.78, 127.72, 127.67, 126.8, 126.6, 126.3, 125.9, 125.2, 123.7, 71.6, 49.6, 45.0, 38.9; HRMS (ESI): calcd for  $\text{C}_{25}\text{H}_{21}\text{Cl}_2\text{O}$ :  $[\text{M}+\text{H}^+]$  407.0964, found 407.0971.

### 1,3-dichloro-3-methyl-1,5-diphenylpentan-5-one (2w)

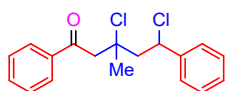

Yield: 66%, *d.r* > 20:1; Pale yellow oil;  $^1\text{H}$  NMR ( $\text{CDCl}_3$ , 400 Hz)  $\delta$  7.89 (d,  $J = 7.2$  Hz, 2H), 7.54 (t,  $J = 7.2$  Hz, 1H), 7.43 (t,  $J = 7.2$  Hz, 2H), 7.30 (m, 4H), 7.21 (t,  $J = 7.2$  Hz, 1H), 3.86 (m, 1H), 3.40 (m, 2H), 2.78 (m, 2H), 1.95 (s, 3H);  $^{13}\text{C}$  NMR ( $\text{CDCl}_3$ , 100 Hz)  $\delta$  197.9, 144.1, 136.8, 133.1, 128.7, 128.5, 128.0, 127.8, 126.7, 89.9, 54.8, 46.6, 39.0, 37.7; HRMS (ESI): calcd for  $\text{C}_{18}\text{H}_{19}\text{Cl}_2\text{O}$ :  $[\text{M}+\text{H}^+]$  321.0807, found 321.0814.

### 3-deuterium-1,3-dichloro-1,5-diphenylpentan-5-one (2a')

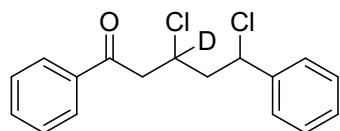

Yield: 78%; Pale yellow oil;  $^1\text{H}$  NMR ( $\text{CDCl}_3$ , 400 Hz)  $\delta$  7.90 (d,  $J = 7.2\text{Hz}$ , 2H), 7.56 (t,  $J = 7.2\text{Hz}$ , 1H), 7.45 (t,  $J = 7.2\text{Hz}$ , 2H), 7.34 (t,  $J = 7.2\text{Hz}$ , 2H), 7.25 (m, 3H), 3.72 (m, 1H), 3.34 (m, 2H), 2.68 (m, 1H), 2.53 (m, 1H);  $^{13}\text{C}$  NMR ( $\text{CDCl}_3$ , 100 Hz)  $\delta$  197.6, 141.6, 136.8, 133.2, 129.0, 128.6, 128.0, 127.5, 127.2, 49.4, 44.9, 38.6; HRMS (ESI): calcd for  $\text{C}_{17}\text{H}_{16}\text{DCl}_2\text{O}$ :  $[\text{M}+\text{H}^+]$  308.0714, found 308.0731.

### 1-(1-(*tert*-butylperoxy)-3,3-dichloropropyl)benzene (3a)

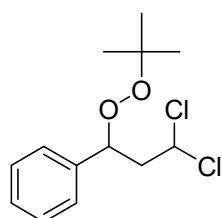

Colorless oil;  $^1\text{H}$  NMR ( $\text{CDCl}_3$ , 400 Hz)  $\delta$  7.38 (m, 5H), 5.84 (dd,  $J = 8.4\text{ Hz}$ ,  $J = 8.4\text{ Hz}$ , 1H), 5.13 (dd,  $J = 8.4\text{ Hz}$ ,  $J = 8.4\text{ Hz}$ , 1H), 2.87 (m, 1H), 2.52 (m, 1H), 1.22 (s, 9H);  $^{13}\text{C}$  NMR ( $\text{CDCl}_3$ , 100 Hz)  $\delta$  139.0, 128.5, 128.3, 126.9, 82.3, 80.7, 70.4, 49.4, 26.4; HRMS (ESI): calcd for  $\text{C}_{13}\text{H}_{18}\text{Cl}_2\text{NaO}_2$ :  $[\text{M}+\text{Na}^+]$  299.0576, found 299.0579.

### 1-(*tert*-butylperoxy)-3,3-dichloro-1,1-diphenylpropane (4a)

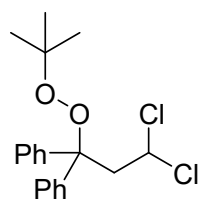

Colorless oily liquid;  $^1\text{H}$  NMR ( $\text{CDCl}_3$ , 400 Hz)  $\delta$  7.35 (m, 10H), 5.96 (dd,  $J = 8.4\text{ Hz}$ ,  $J = 8.4\text{ Hz}$ , 1H), 3.67 (d,  $J = 8.4\text{ Hz}$ , 2H), 1.28 (s, 9H);  $^{13}\text{C}$  NMR ( $\text{CDCl}_3$ , 100 Hz)  $\delta$  143.1, 127.9, 127.4, 126.8, 85.1, 76.8, 69.6, 50.5, 26.6; HRMS (ESI): calcd for  $\text{C}_{19}\text{H}_{22}\text{Cl}_2\text{NaO}_2$ :  $[\text{M}+\text{Na}^+]$  375.0889, found 375.0888.

#### 4. $^1\text{H}$ and $^{13}\text{C}$ -NMR spectrum of products

##### 1,3-dichloro-1,5-diphenylpentan-5-one (2a)

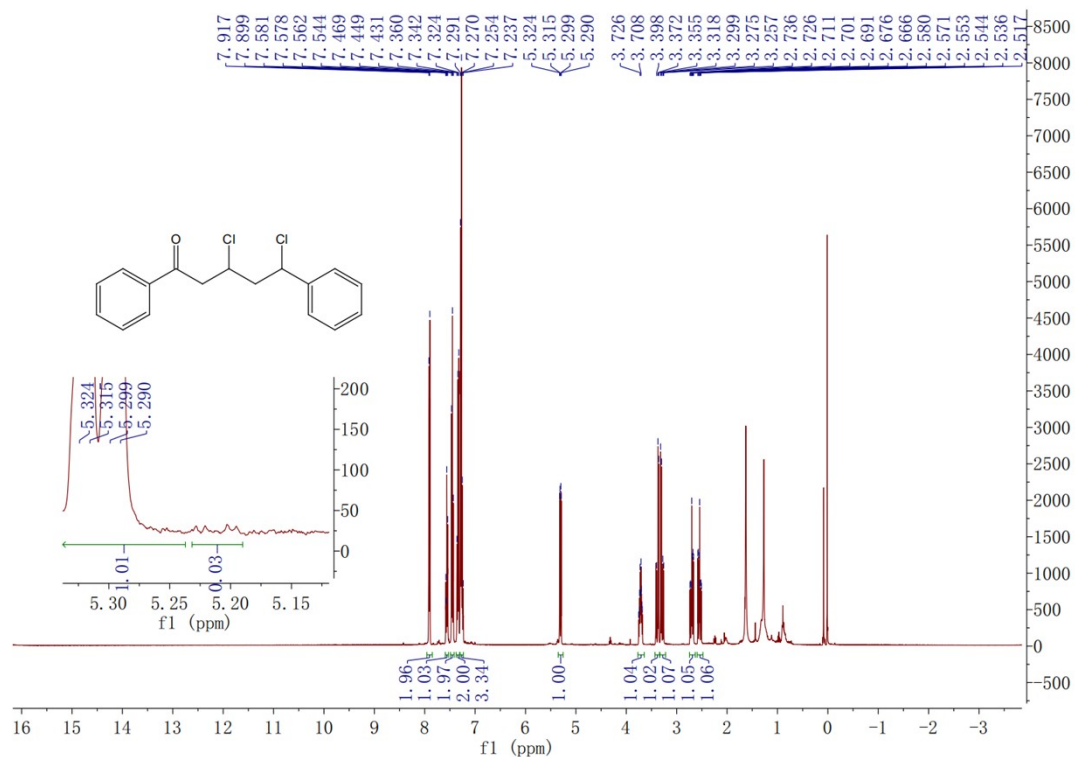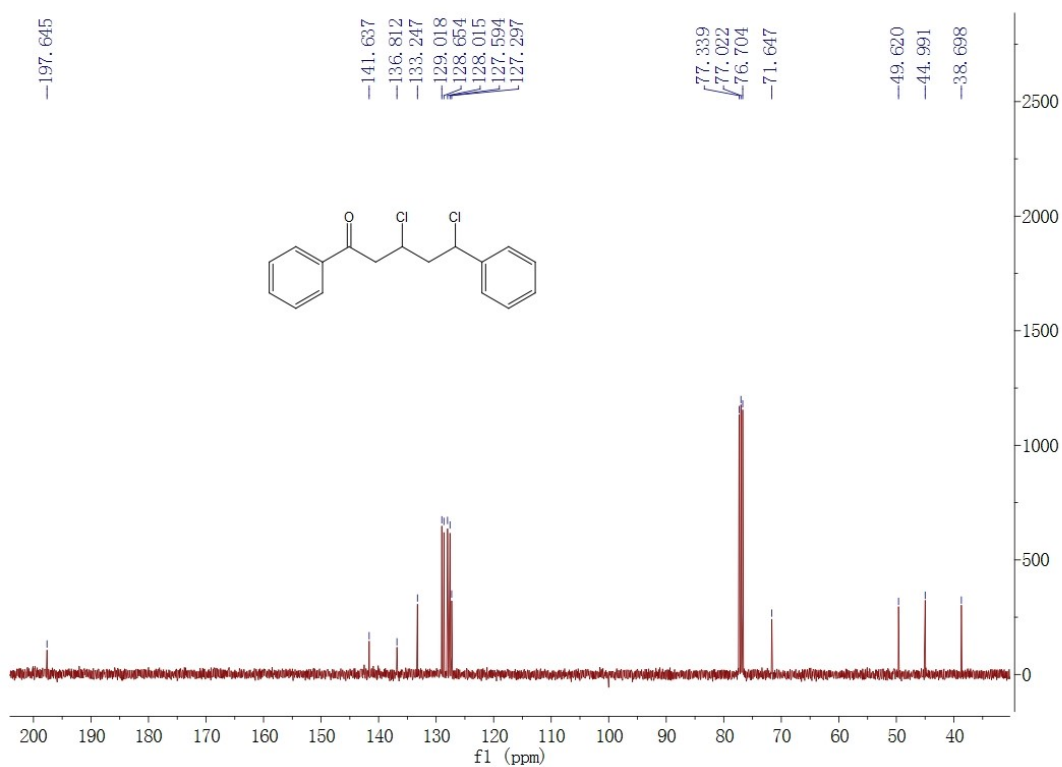

# 1,3-dichloro-1,5-bis(4-methoxyphenyl)pentan-5-one (2b)

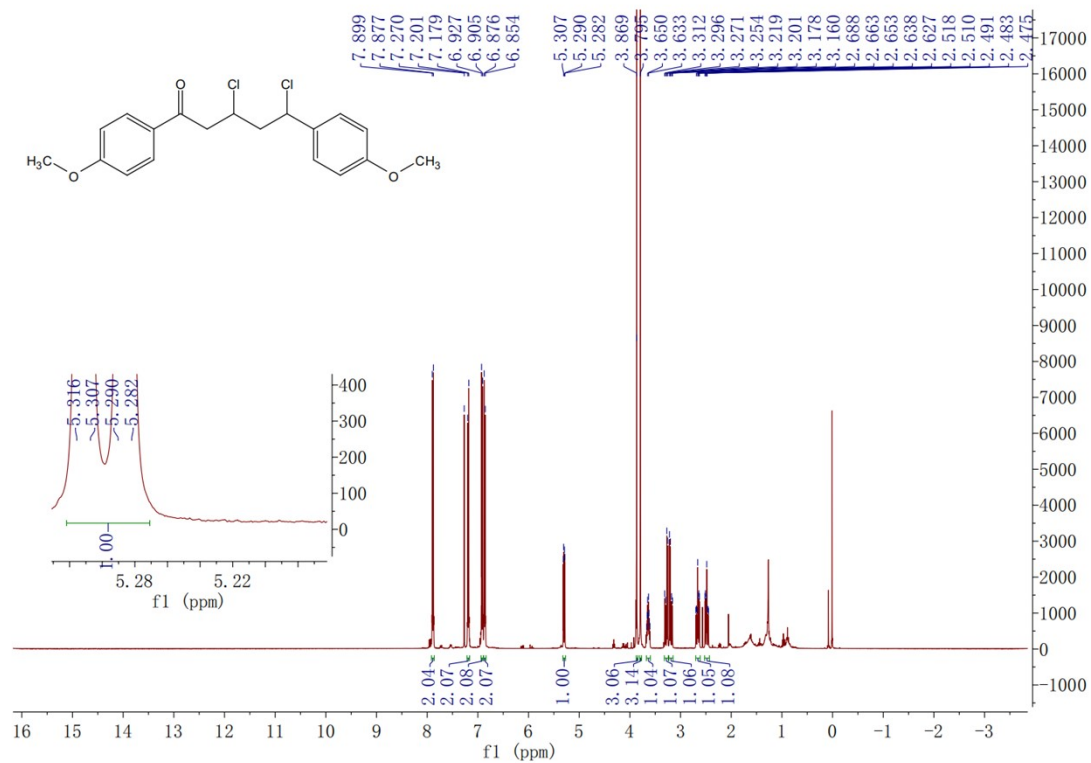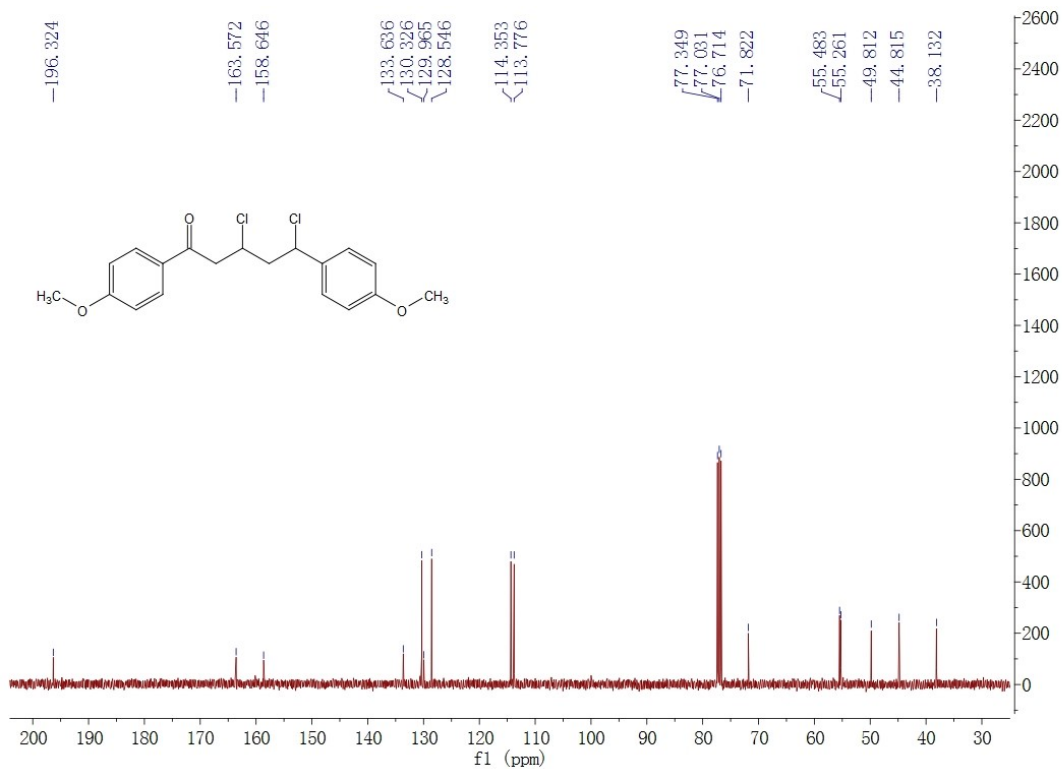

### 1,3-dichloro-1,5-bis(4-ethoxyphenyl)pentan-5-one (2c)

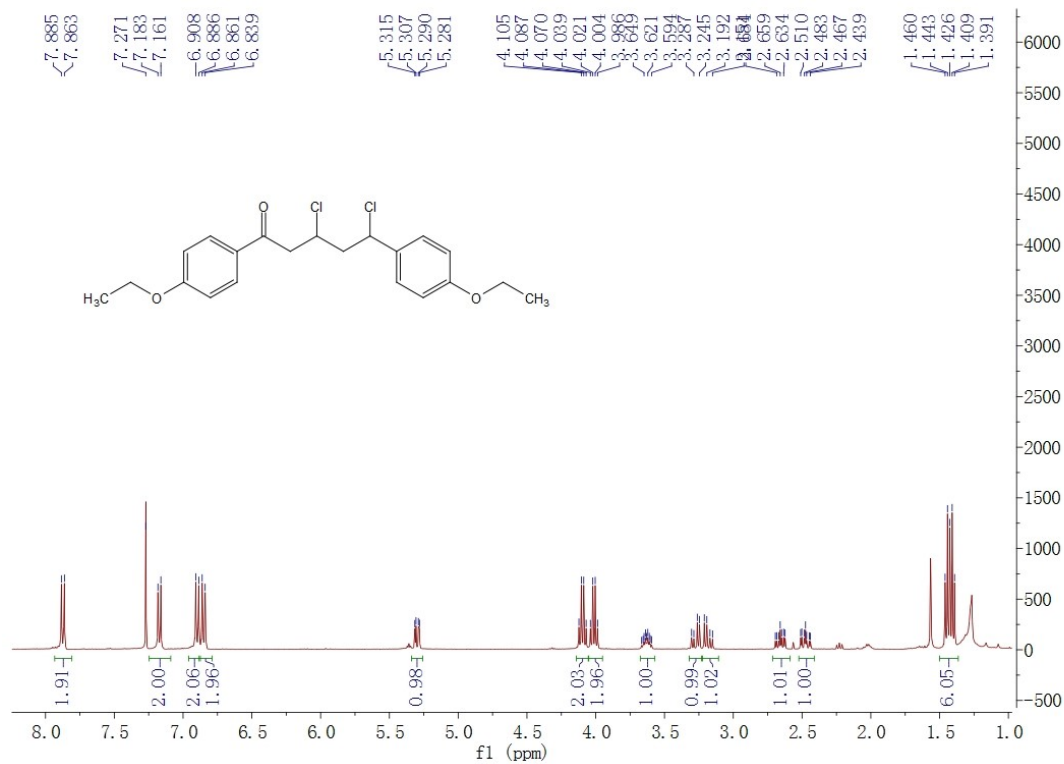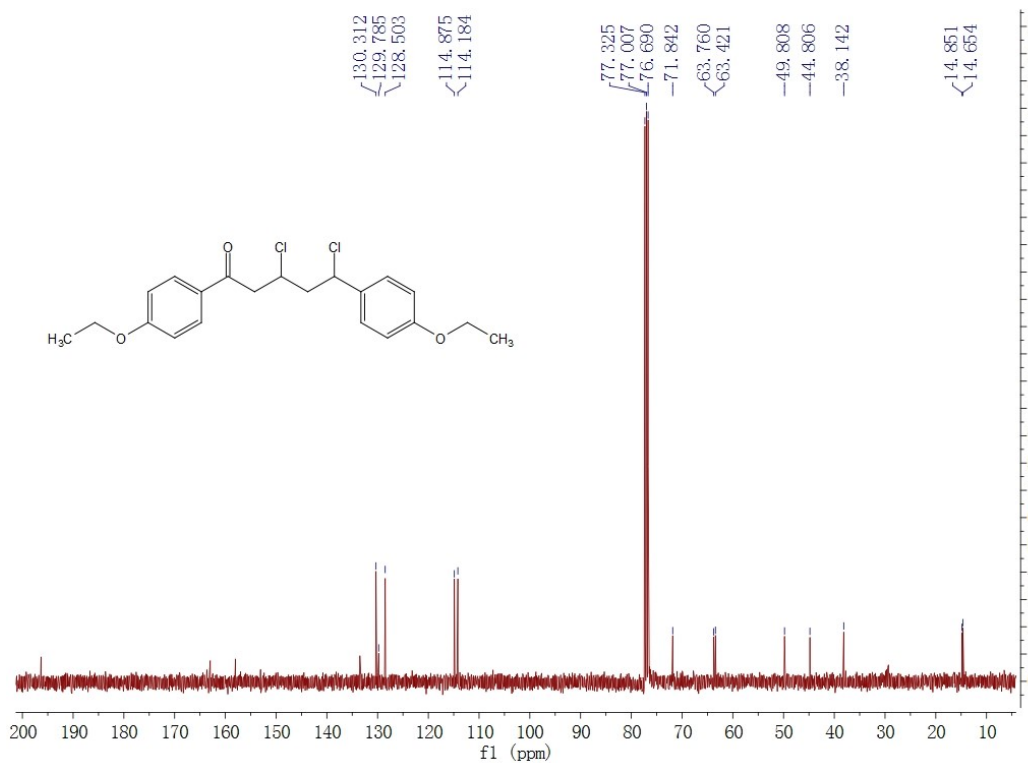

### 1,5-bis(4-tert-butoxyphenyl)-1,3-dichloropentan-5-one (2d)

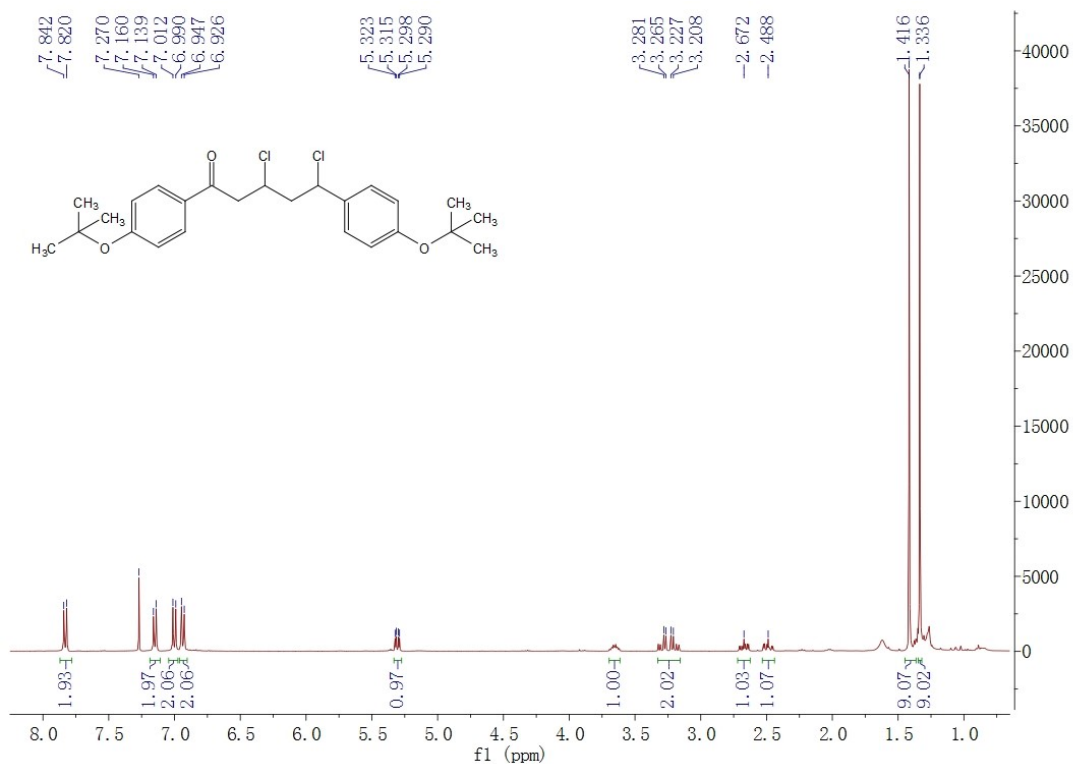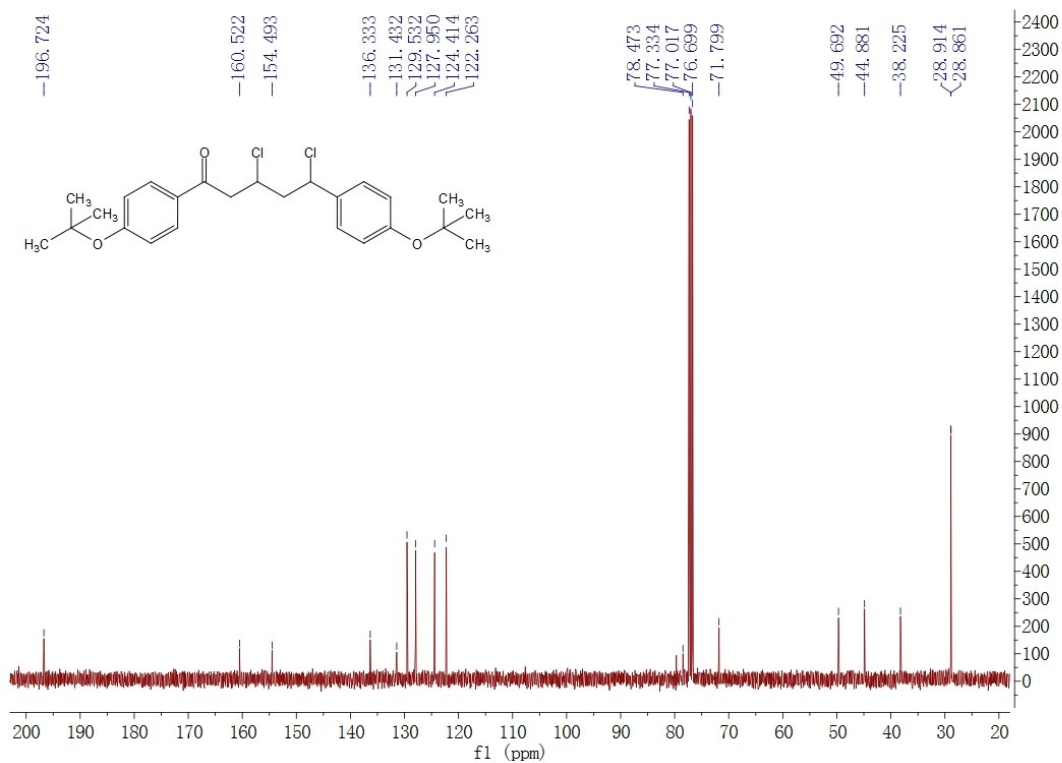

# 1,3-dichloro-1,5-dip-tolylpentan-5-one (2e)

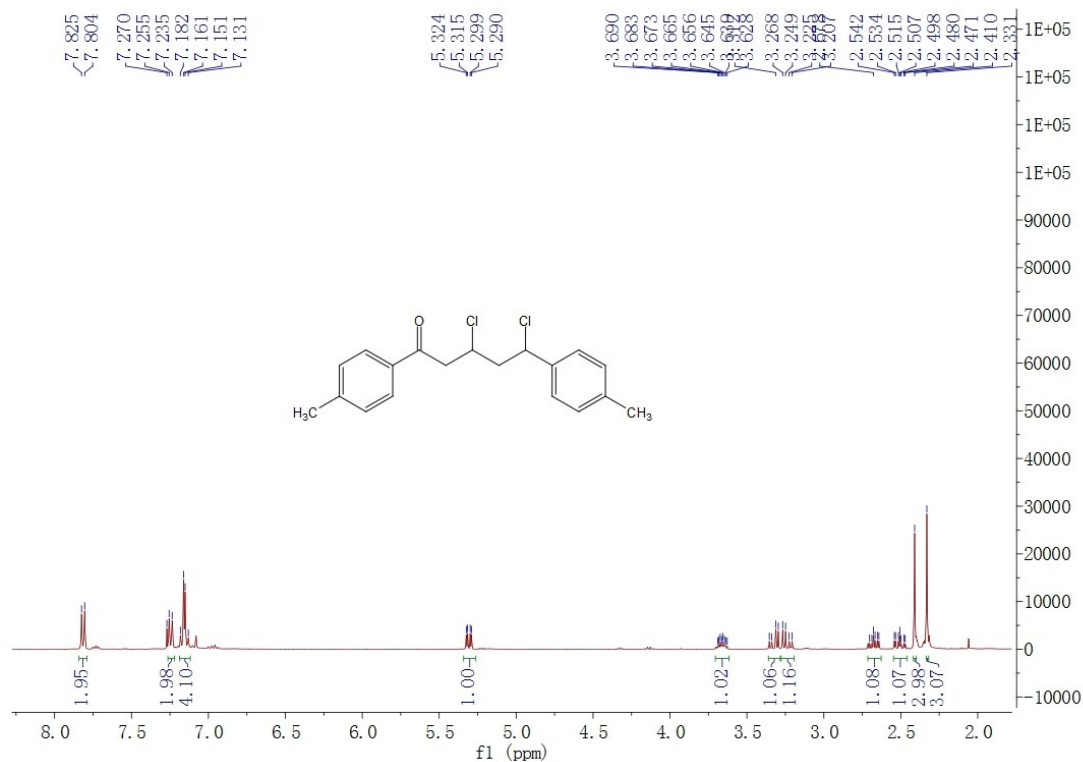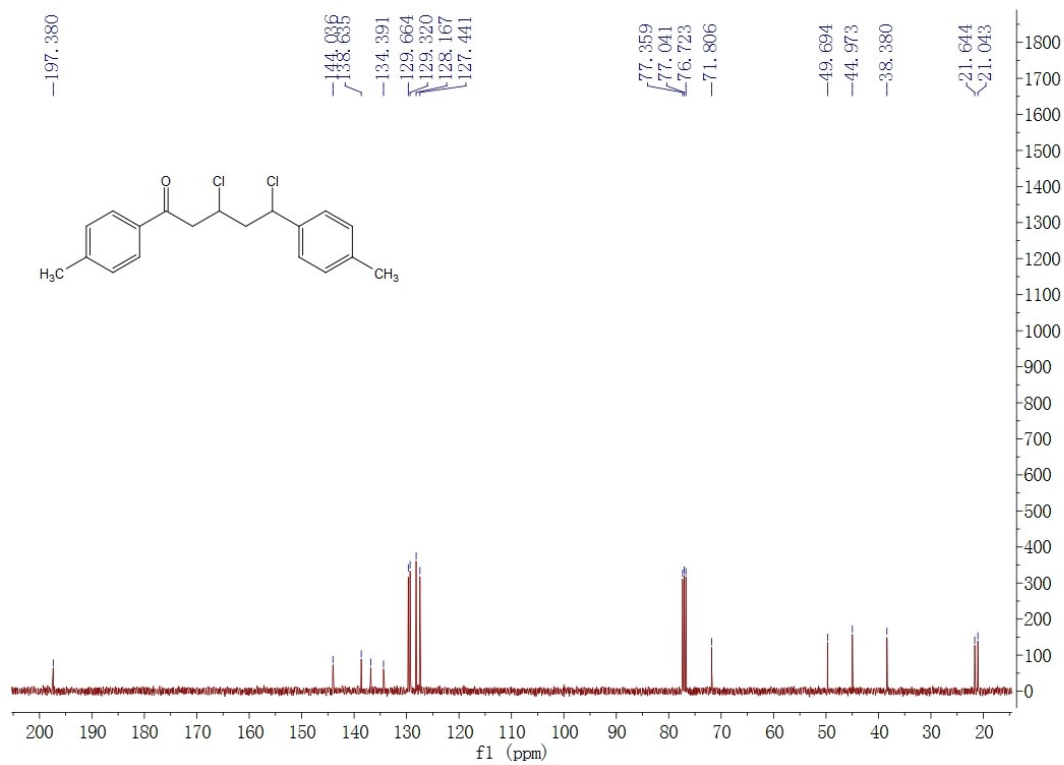

# 1,5-bis(4-tert-butylphenyl)-1,3-dichloropentan-5-one (2f)

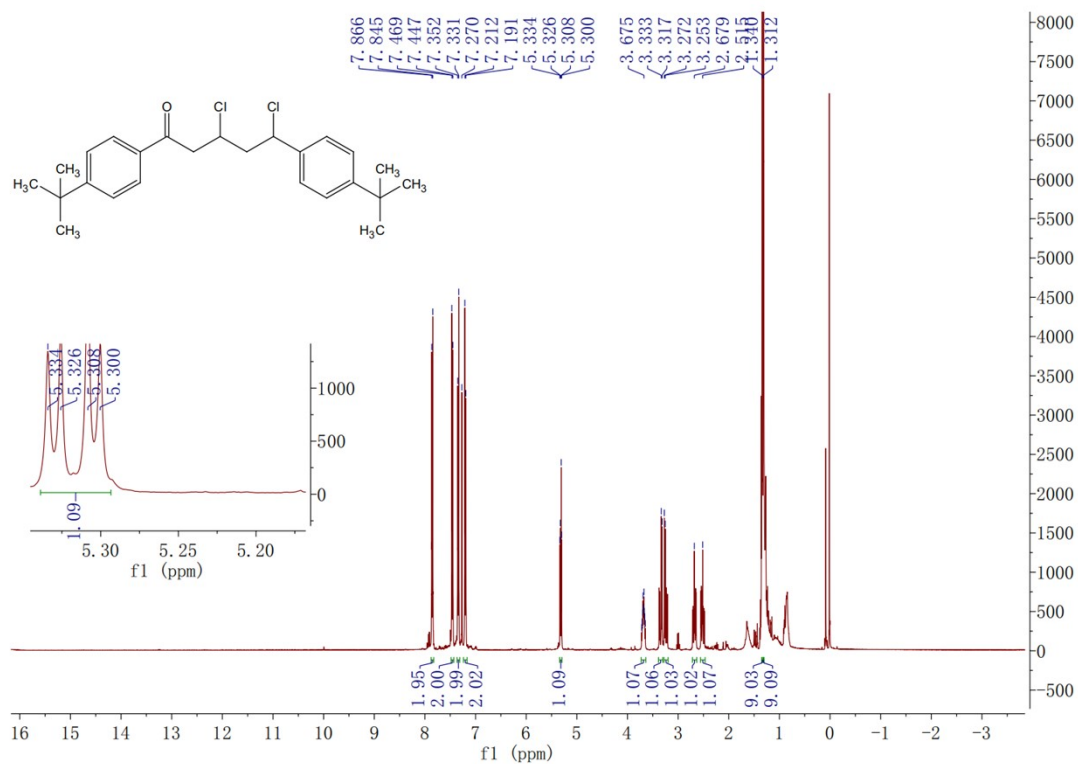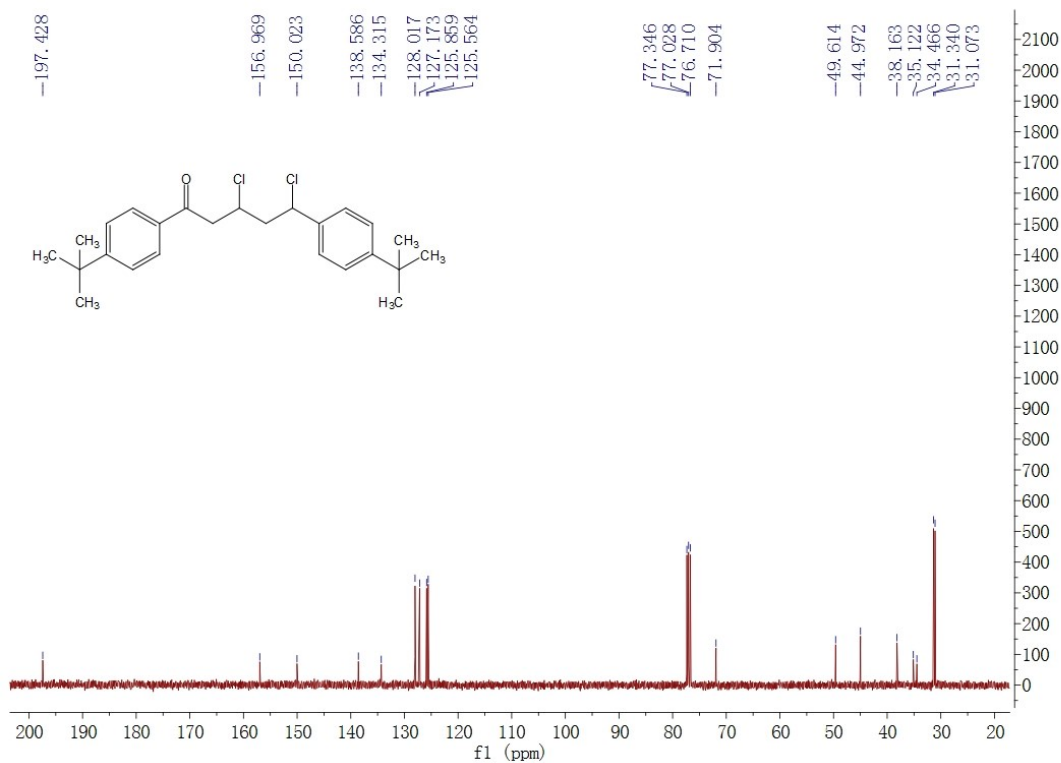



# 1,5-bis(4-phenylphenyl)-1,3-dichloropentan-5-one (2g)

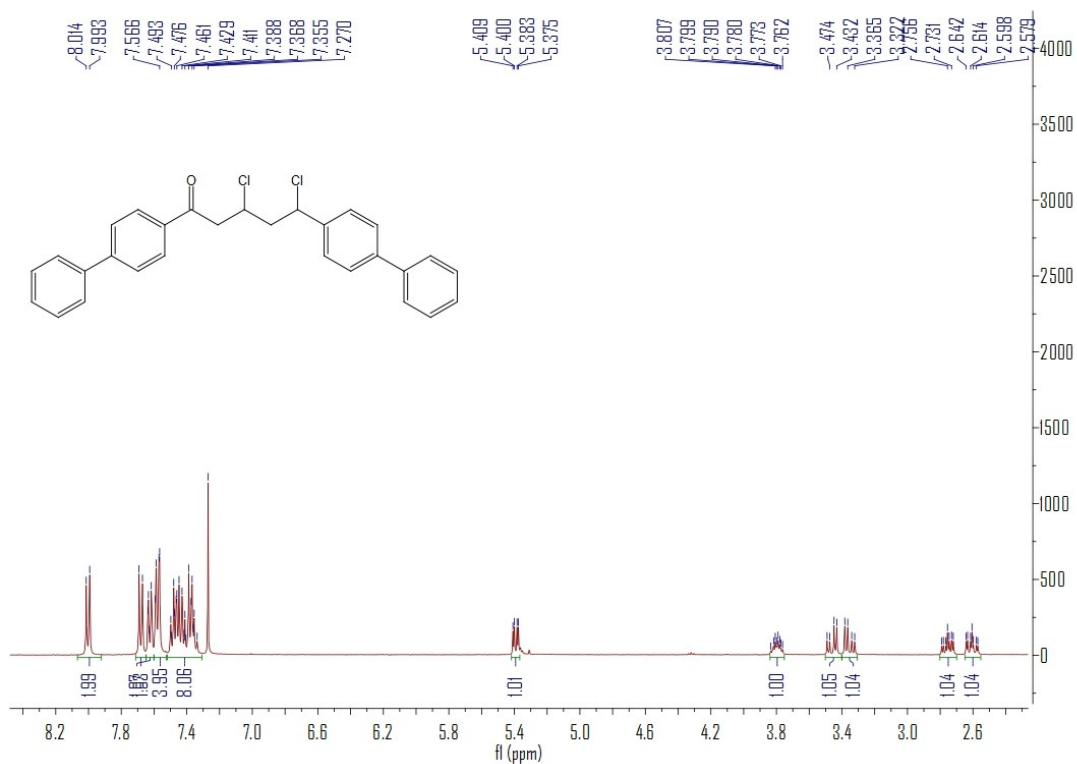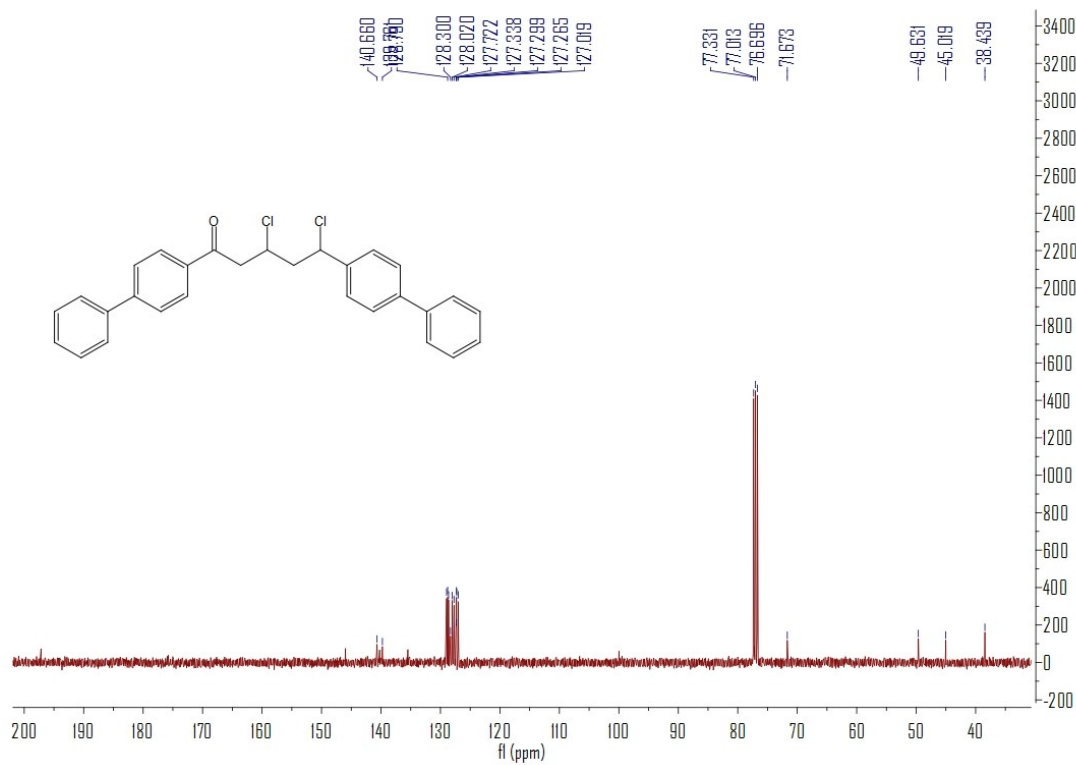

**1,3-dichloro-1,5-bis(4-fluorophenyl)pentan-5-one (2h)**

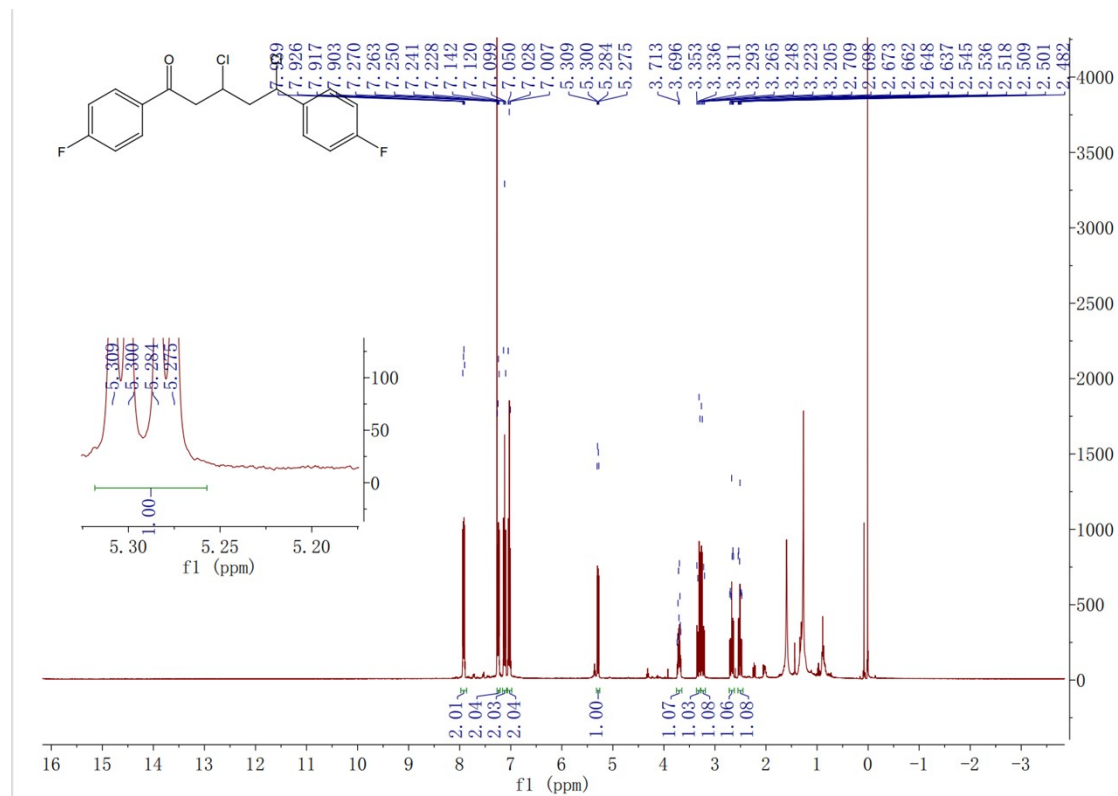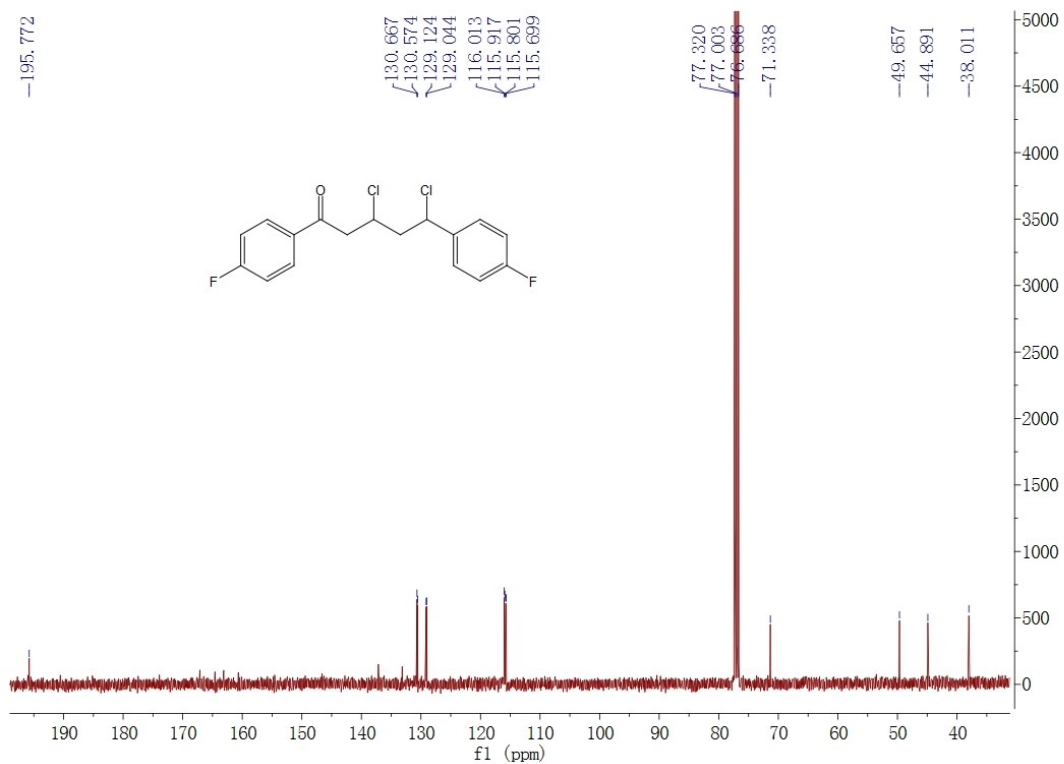

# 1,3-dichloro-1,5-bis(3-chlorophenyl)pentan-5-one (2i)

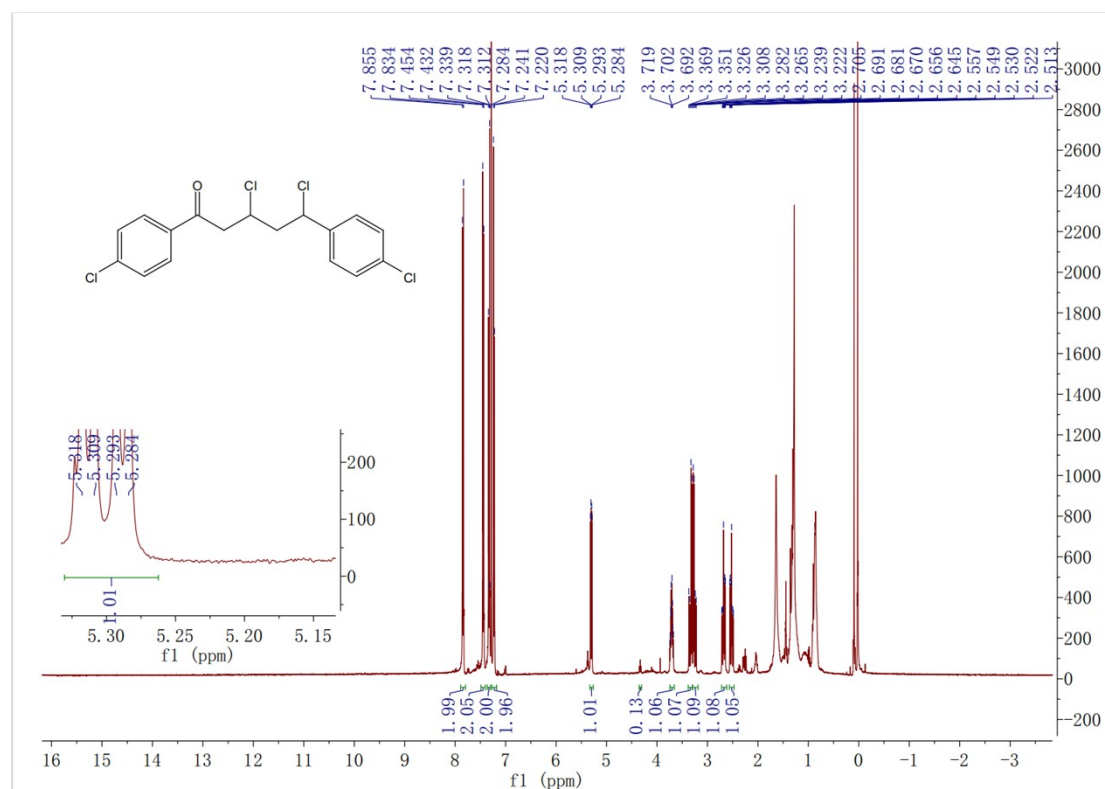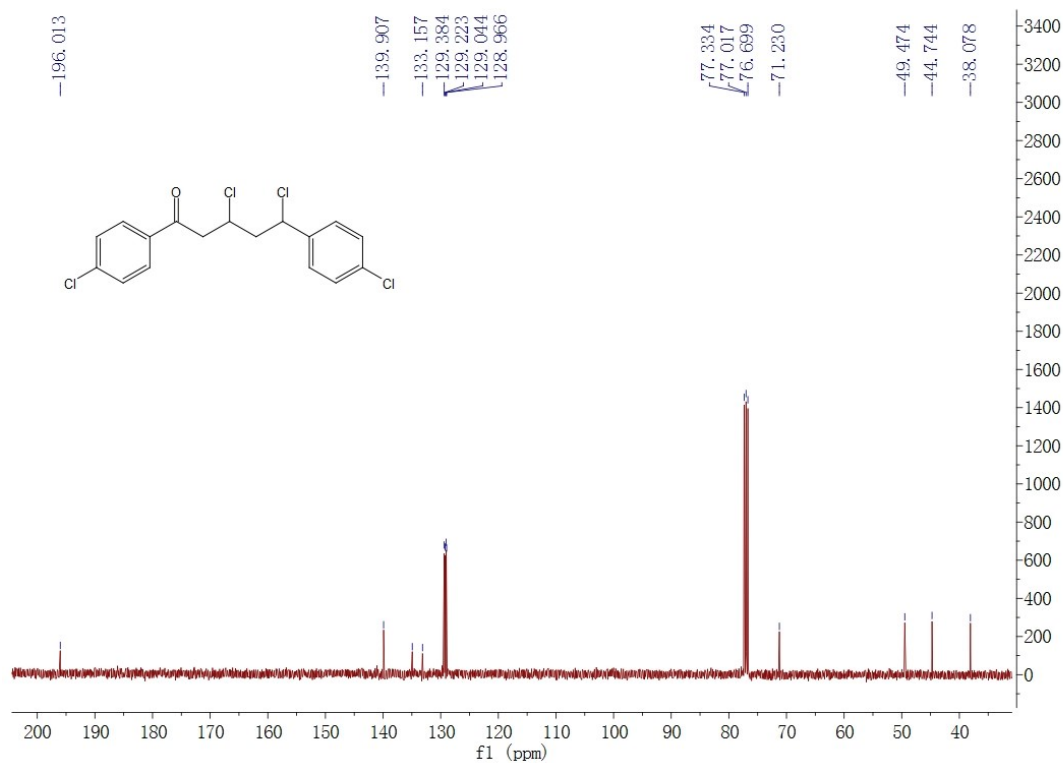

# 1,5-bis(4-bromophenyl)-1,3-dichloropentan-5-one (2j)

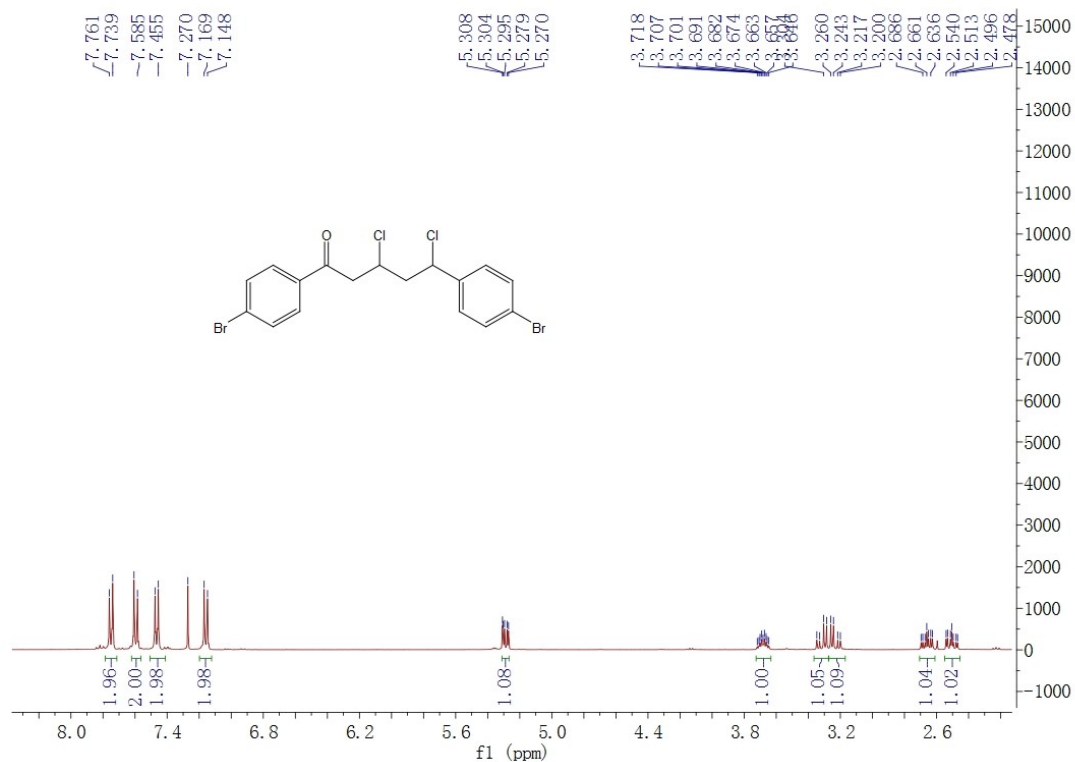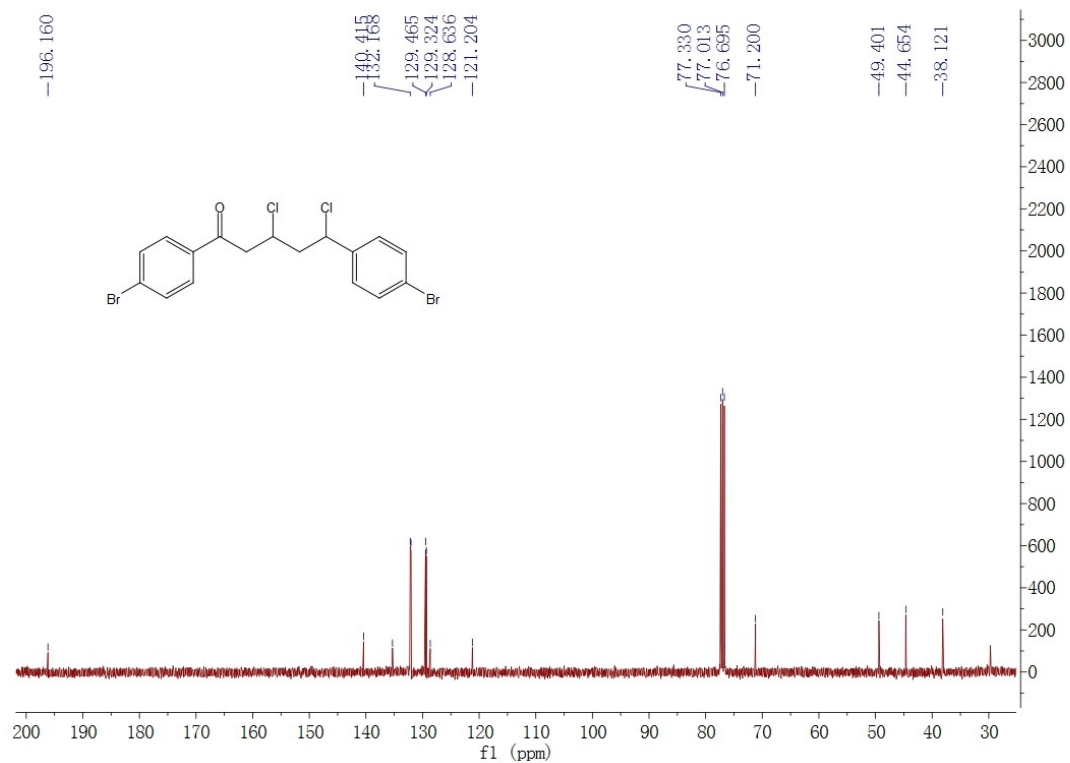

**4,4'-(1,3-dichloro-5-oxopentane-1,5-diyl)dibenzonitrile (2k)**

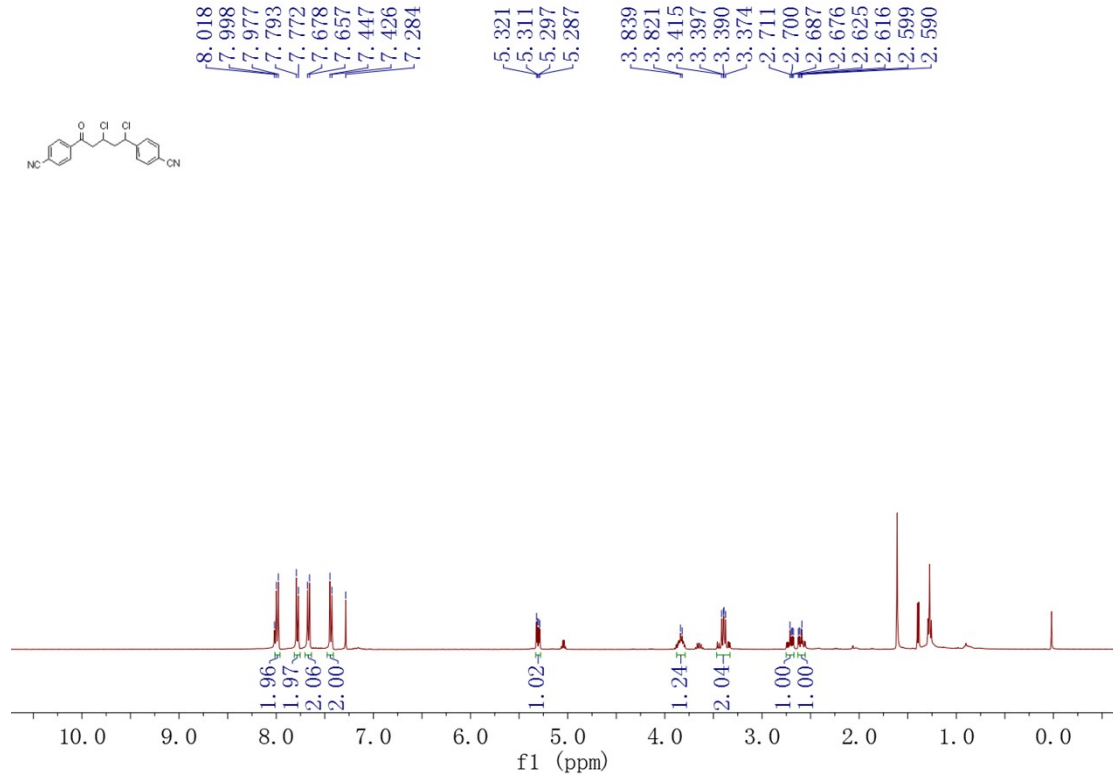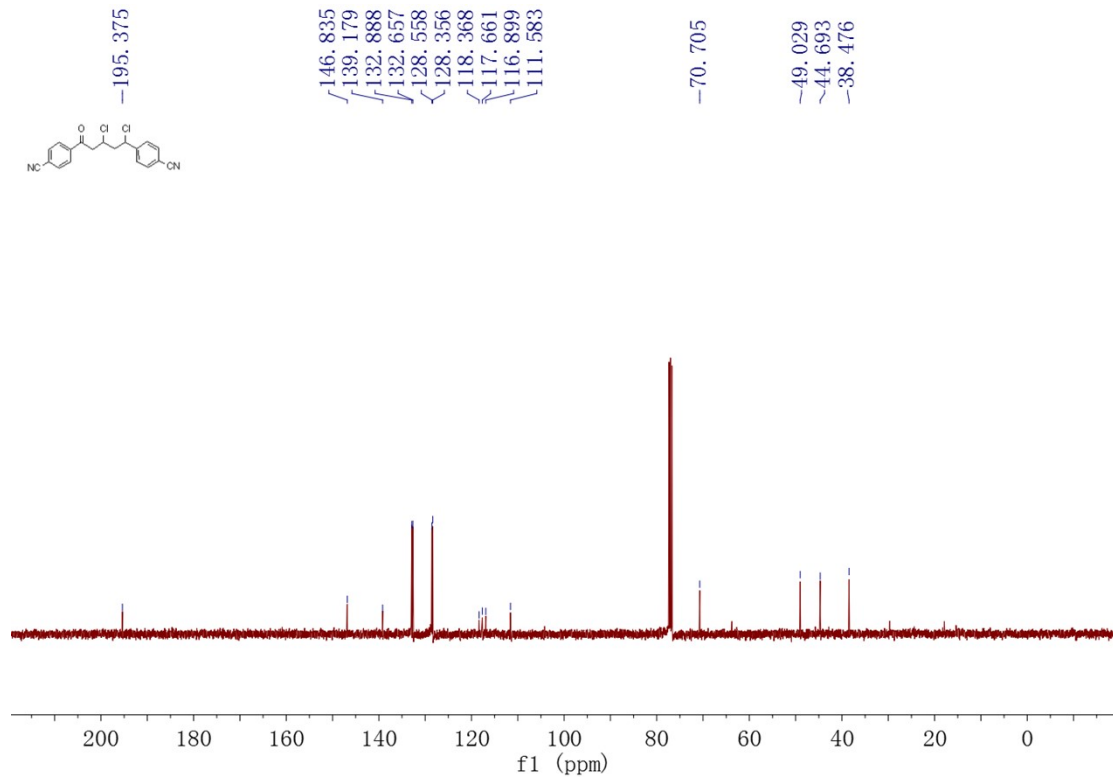

# 1,3-dichloro-1,5-bis(4-(trifluoromethyl)phenyl)pentan-5-one (21)

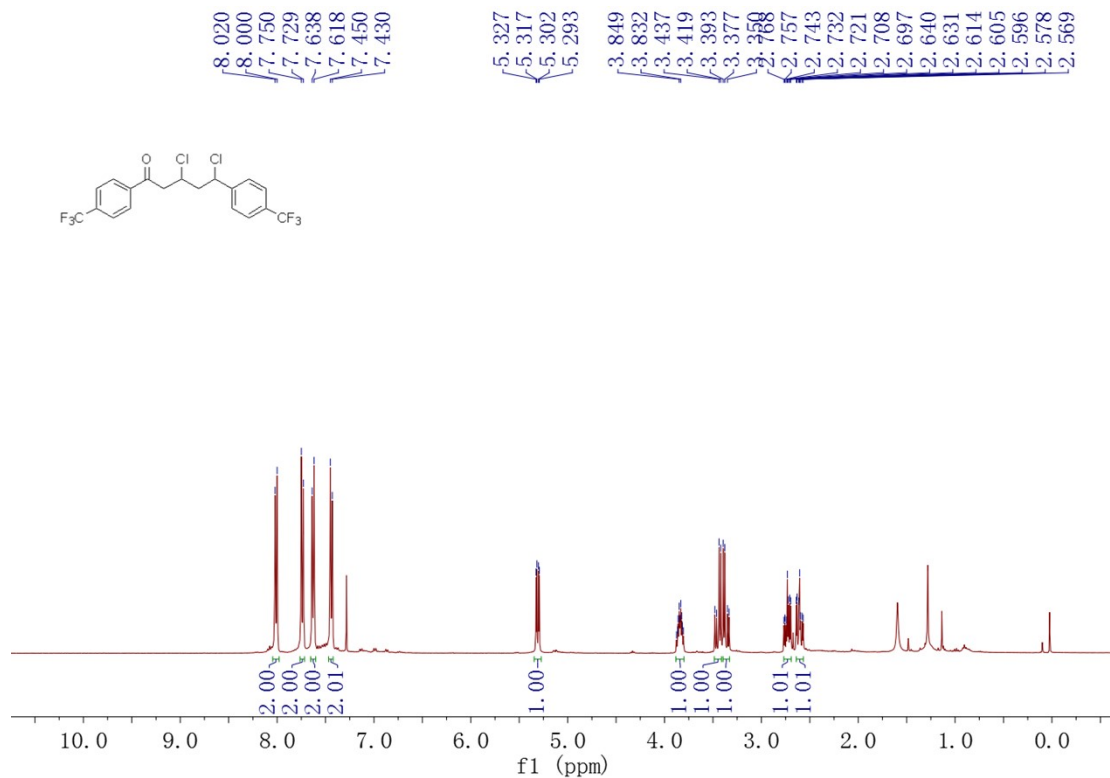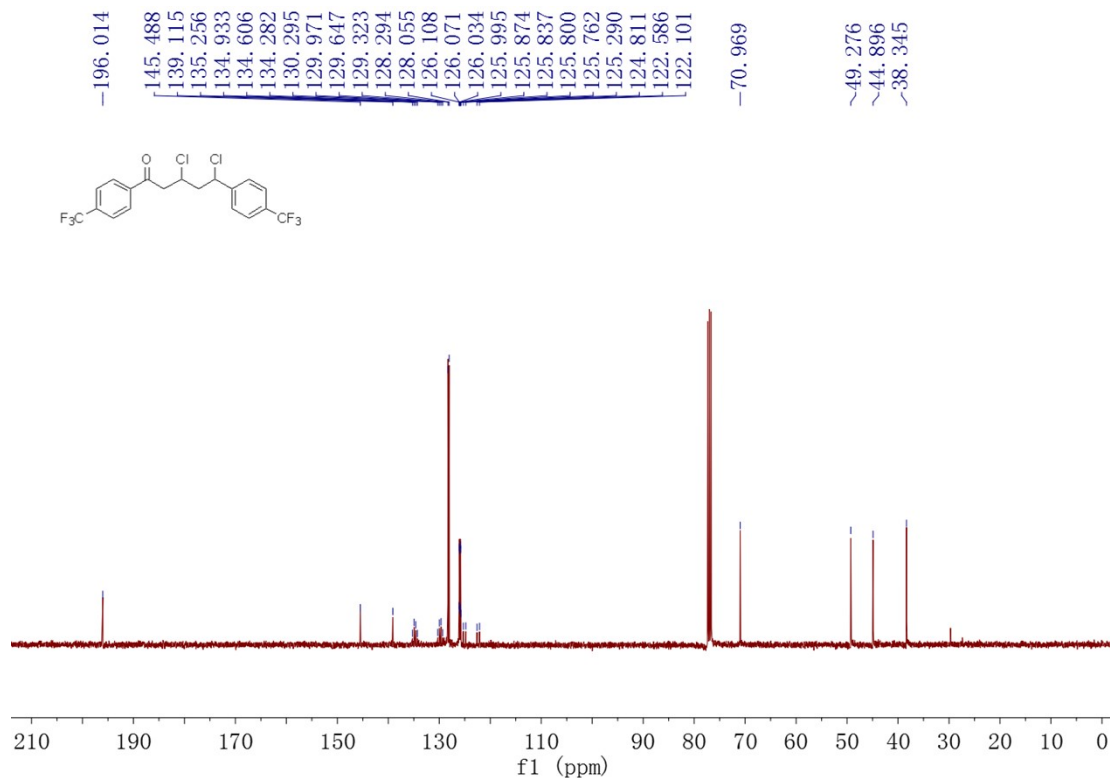

### 1,3-dichloro-1,5-bis(3-methoxyphenyl)pentan-5-one (2m)

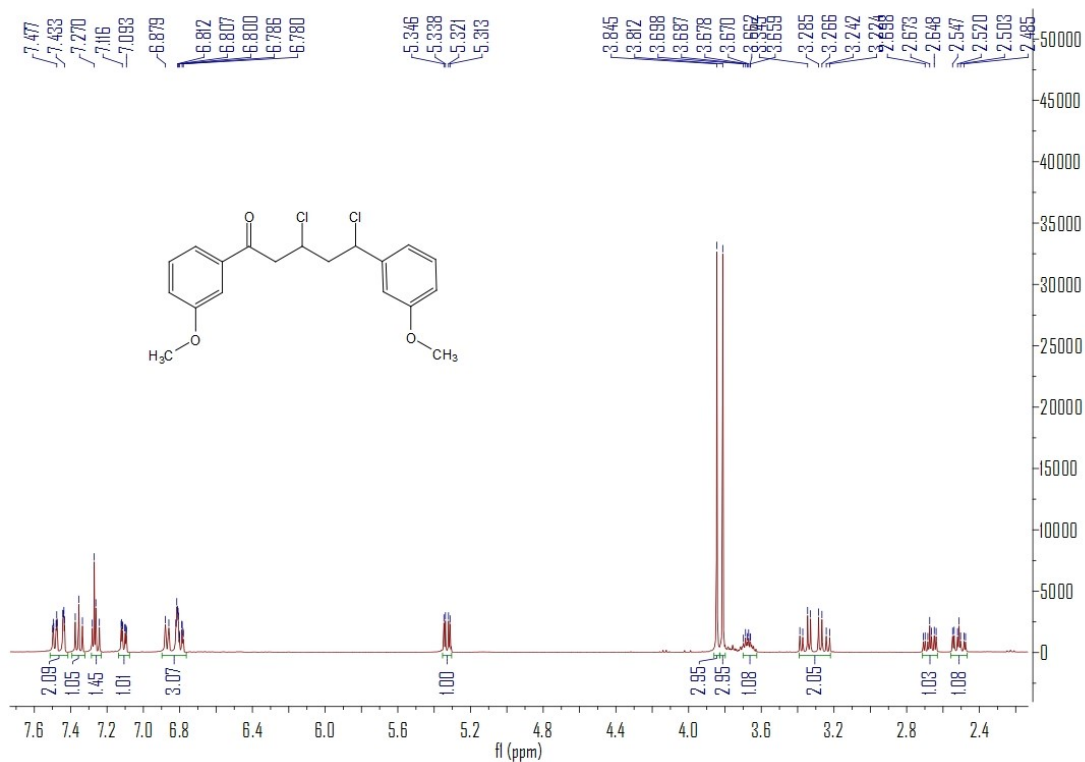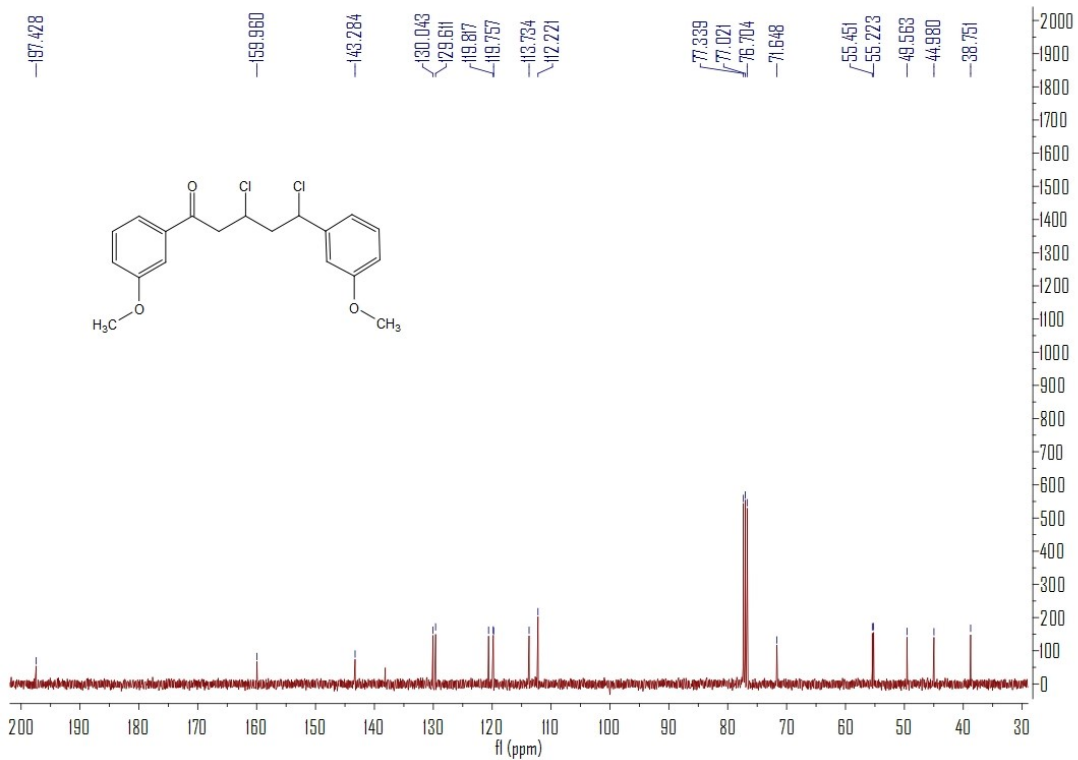

# 1,3-dichloro-1,5-dim-tolylpentan-5-one (2n)

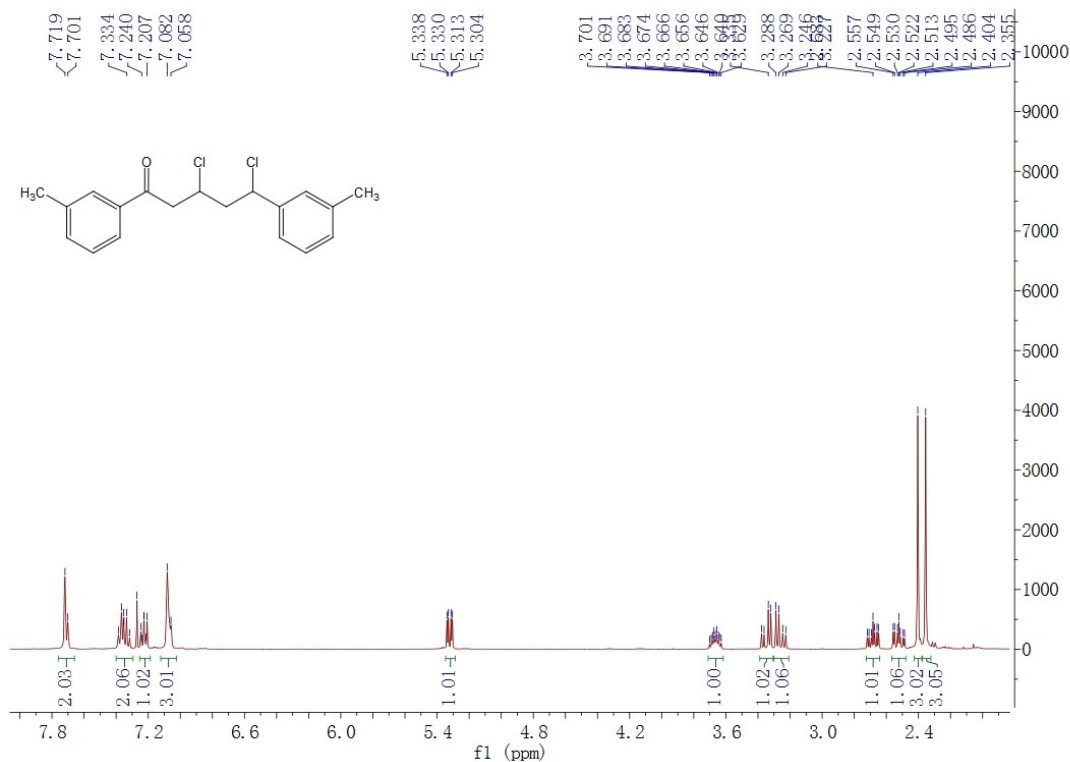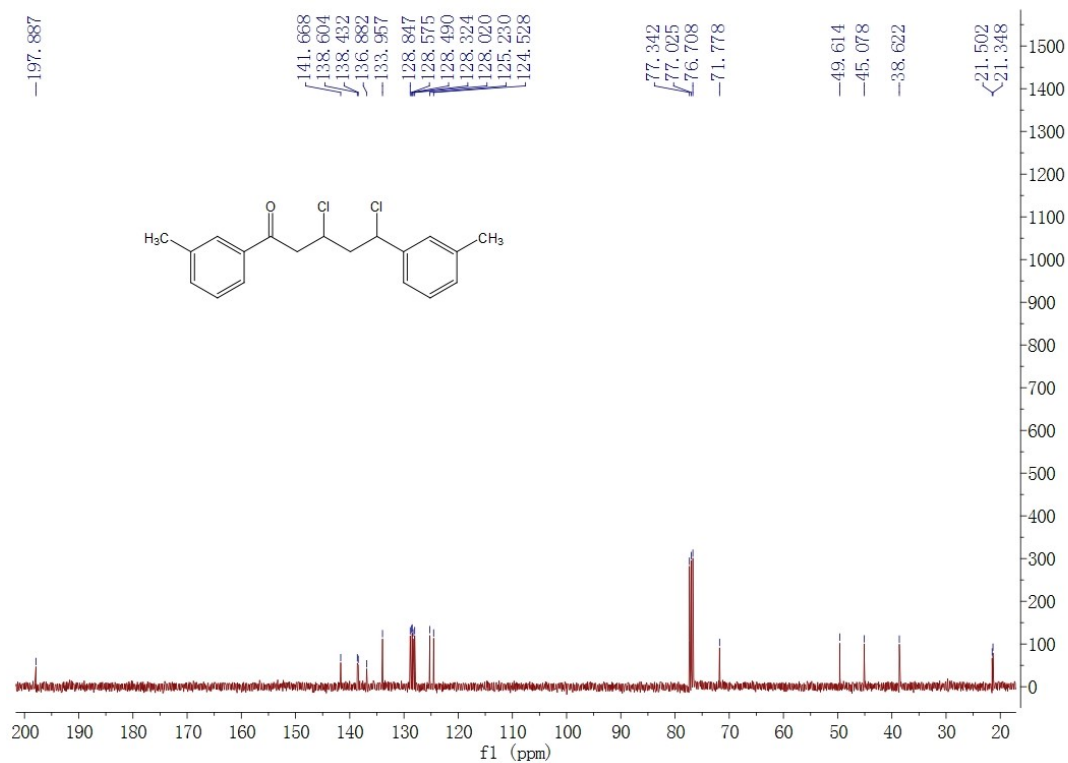



**1,3-dichloro-1,5-bis(3-fluorophenyl)pentan-5-one (2o)**

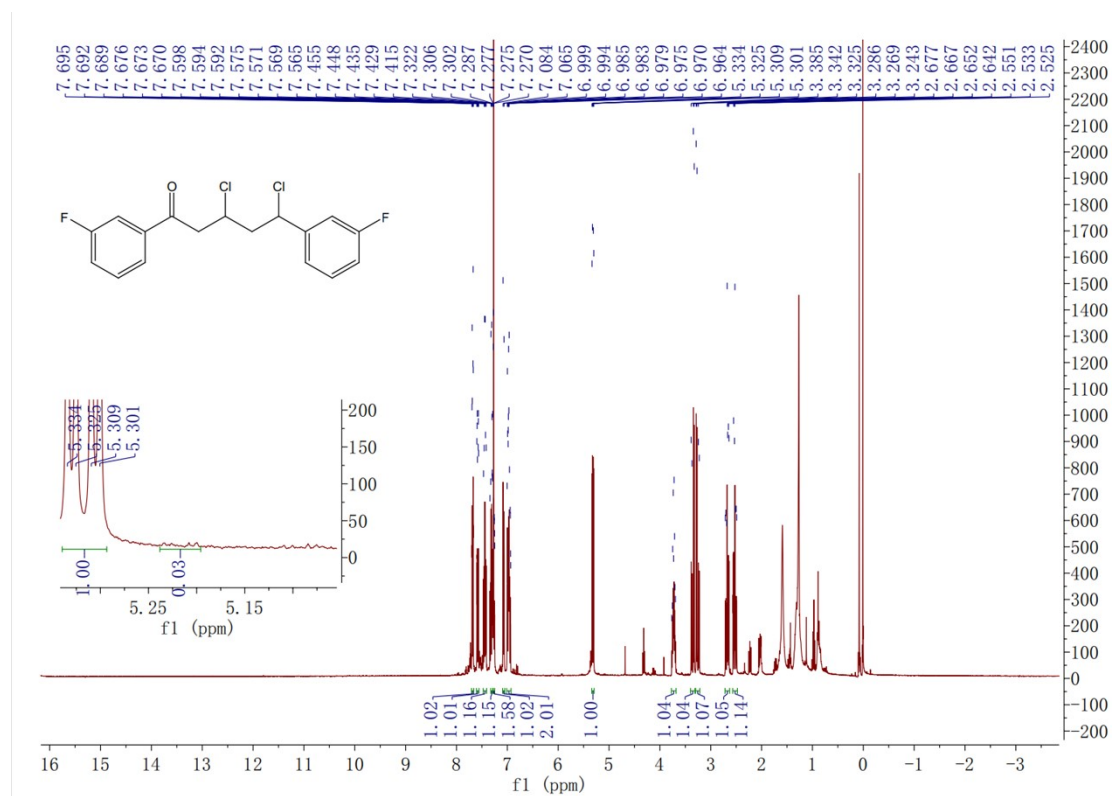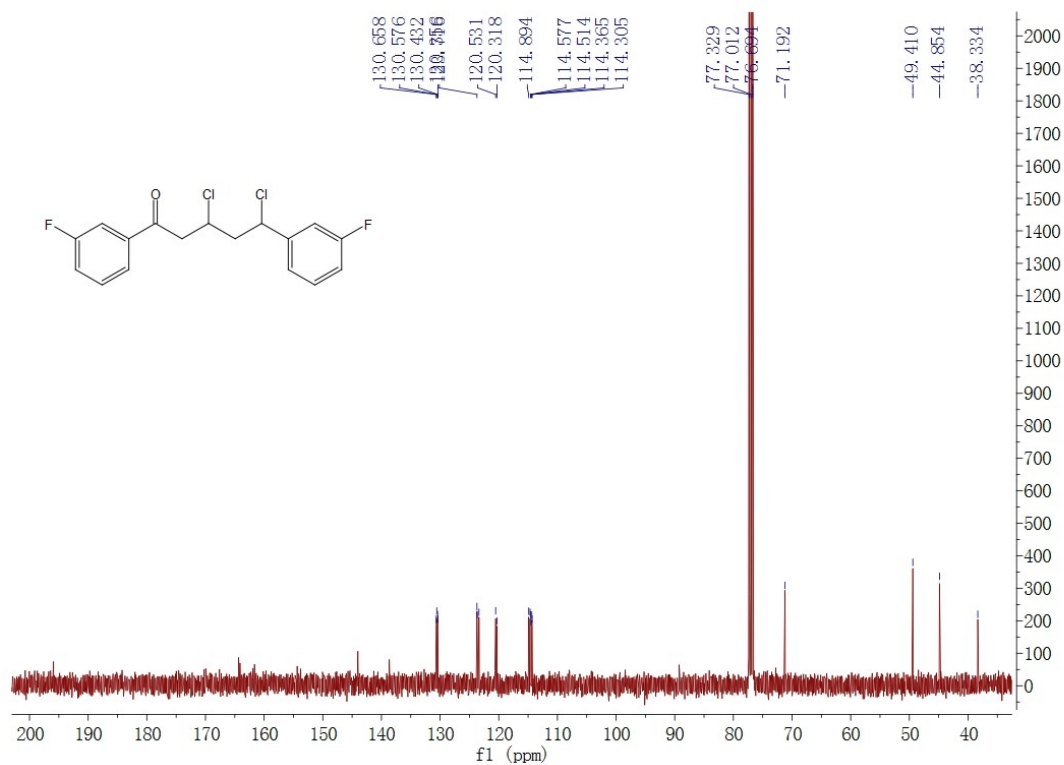

# 1,3-dichloro-1,5-bis(4-chlorophenyl)pentan-5-one (2p)

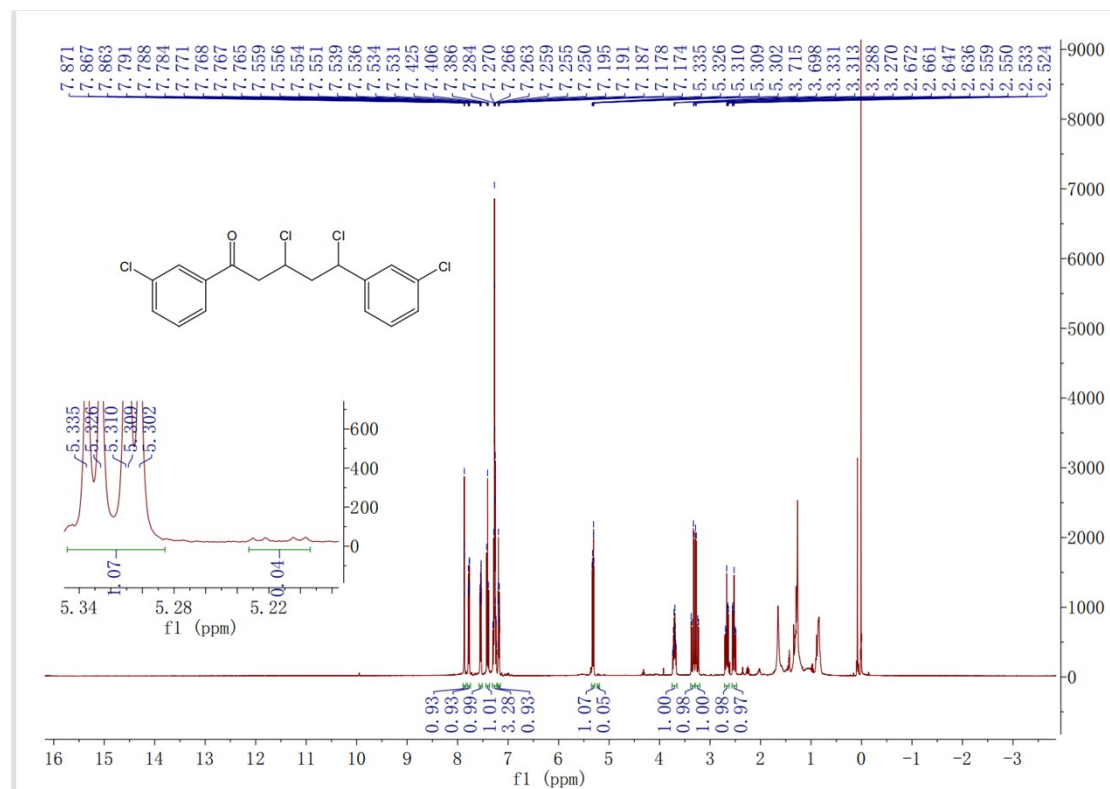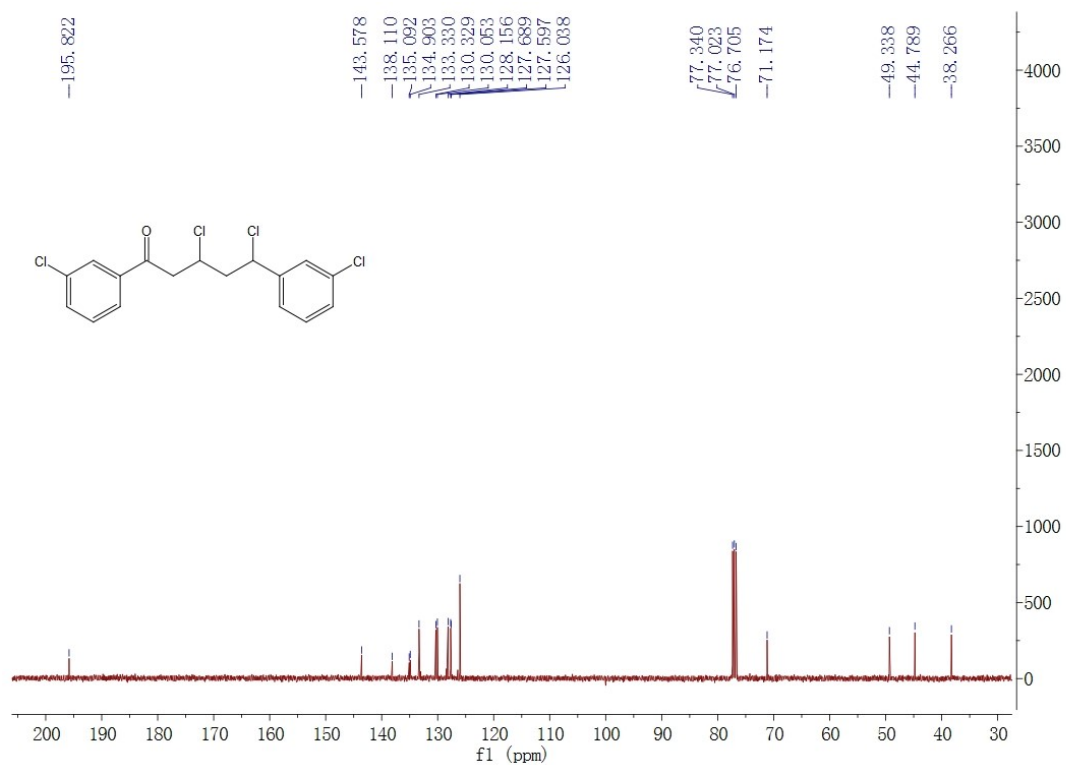

# 1,5-bis(3-bromophenyl)-1,3-dichloropentan-5-one (2q)

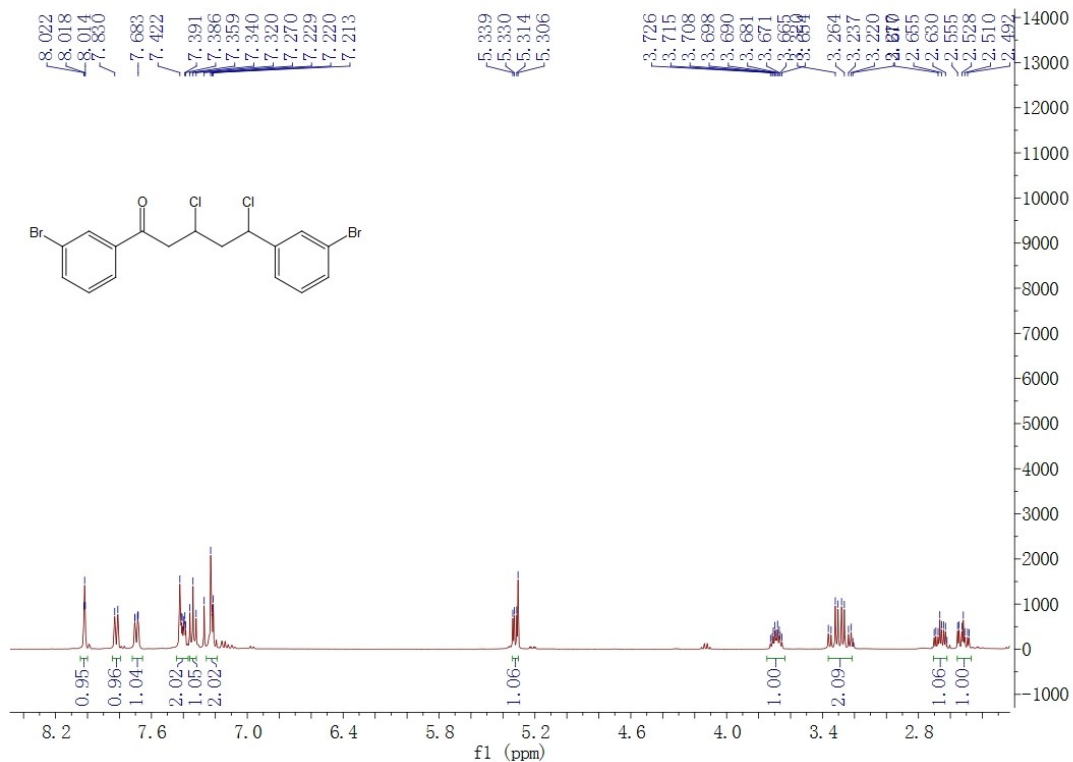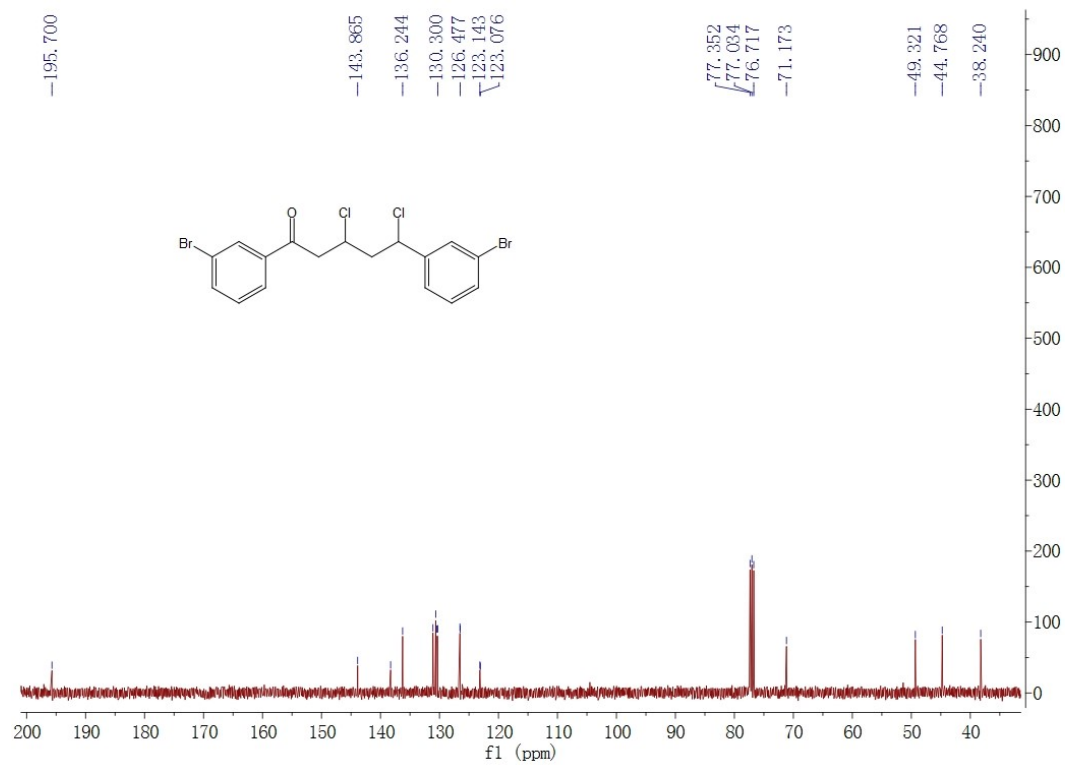

# 1,3-dichloro-1,5-bis(2-fluorophenyl)pentan-5-one (2r)

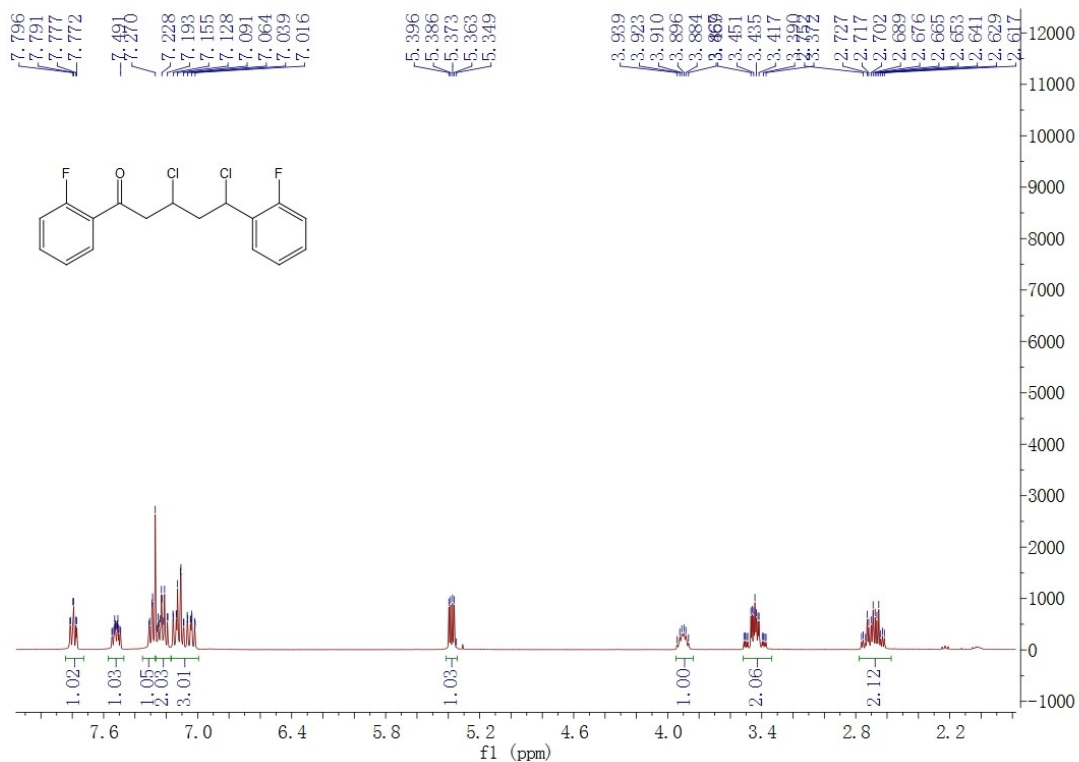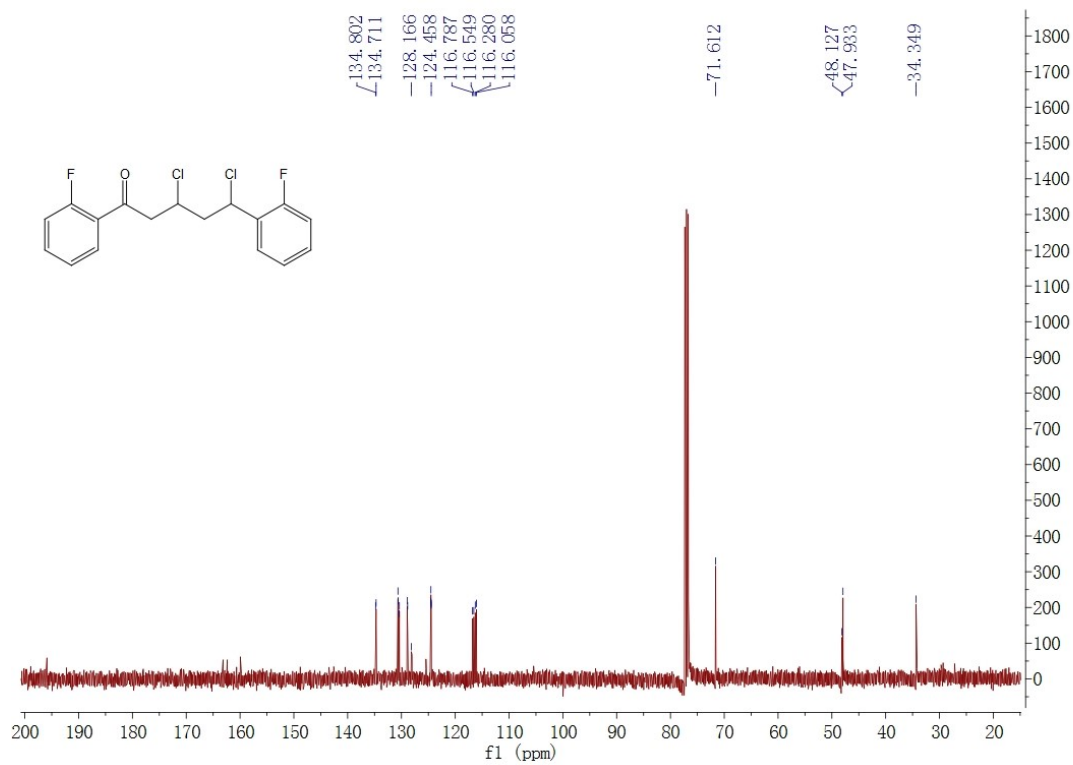

# 1,3-dichloro-1,5-bis(2-chlorophenyl)pentan-5-one (2s)

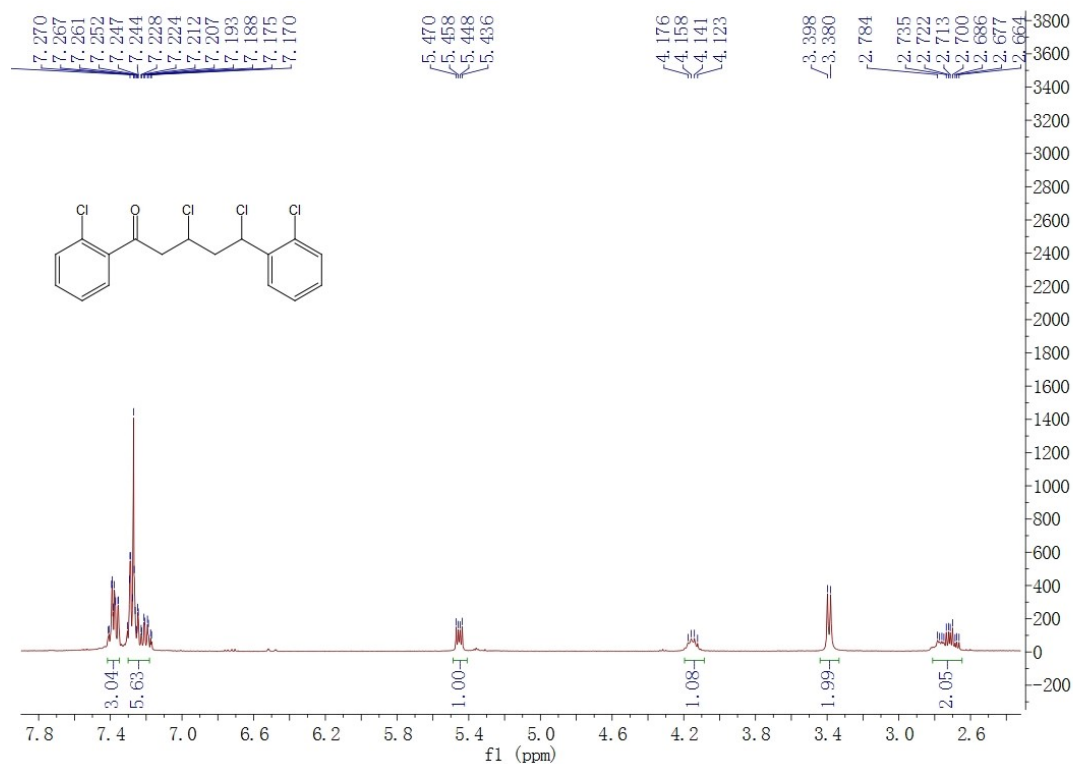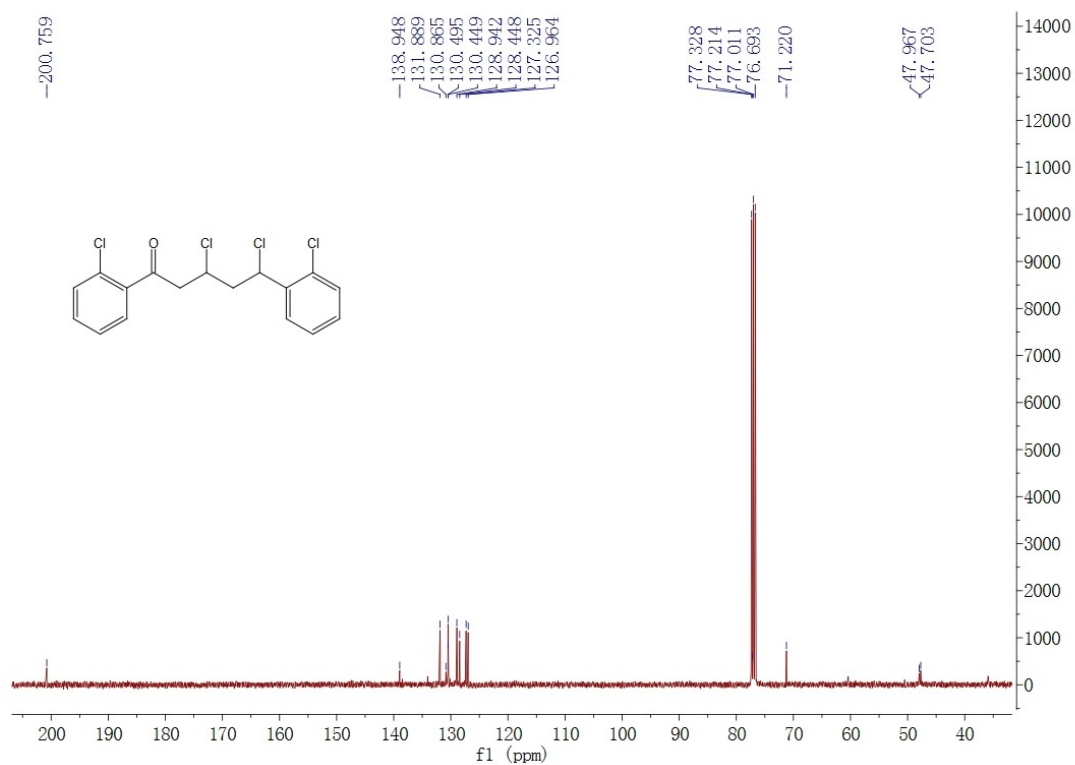

**1,3-dichloro-1,5-di(naphthalen-3-yl)pentan-5-one (2u)**

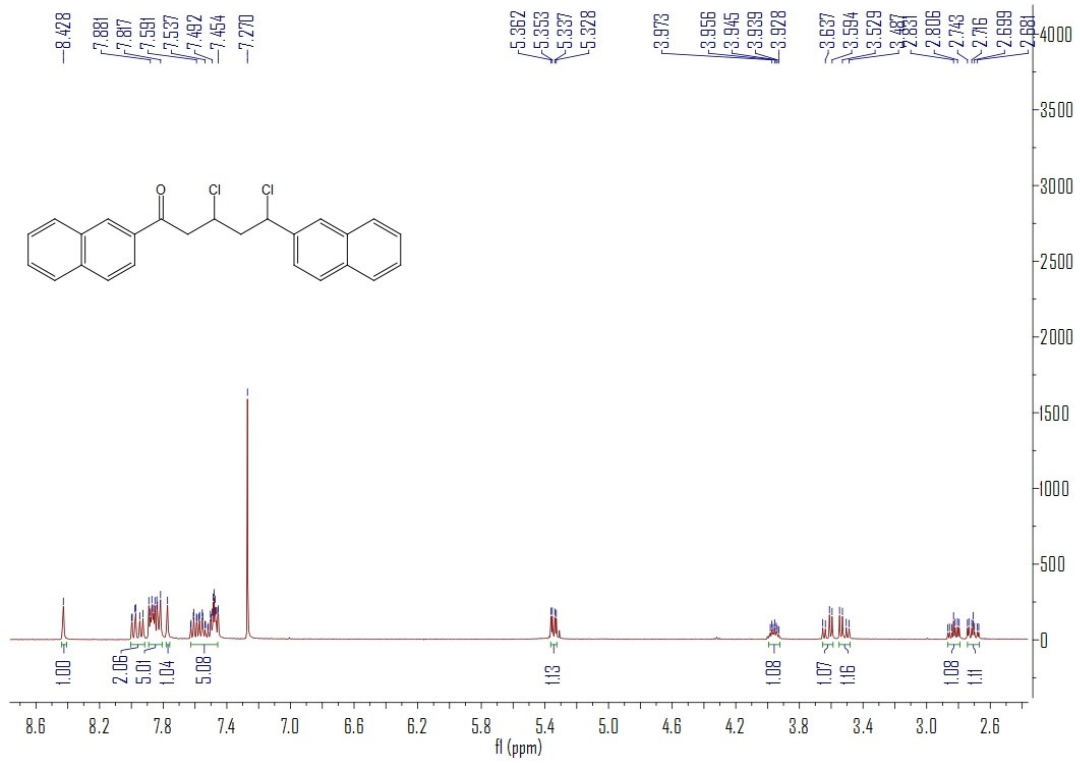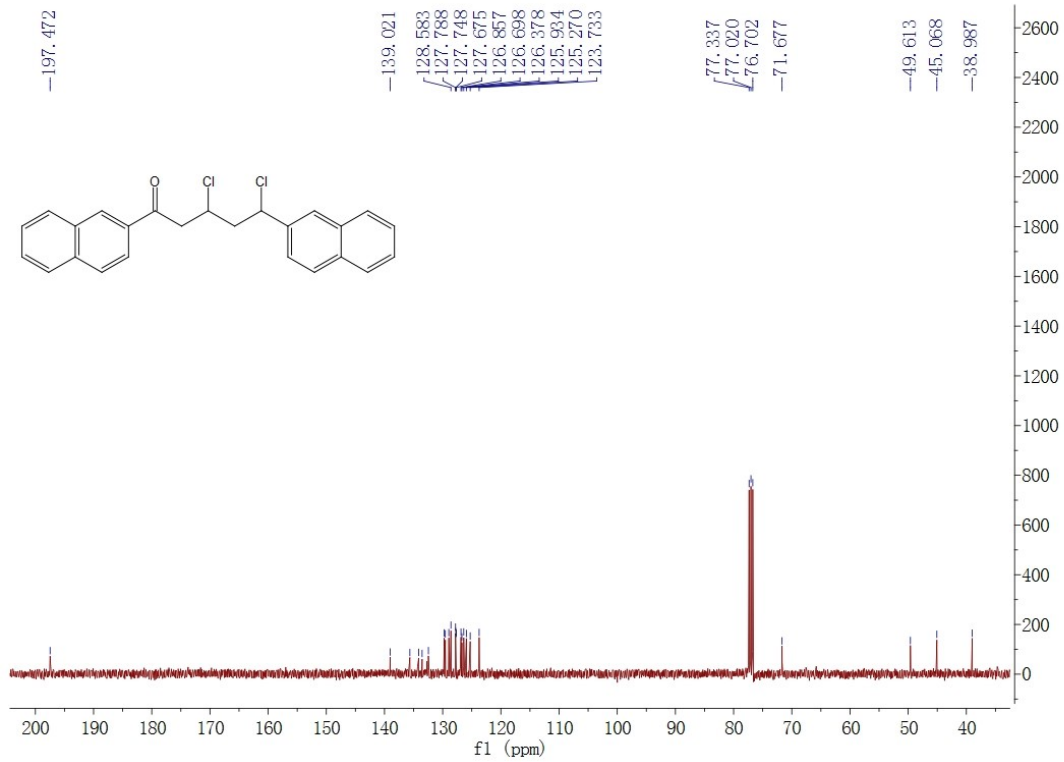

# 1,3-dichloro-3-methyl-1,5-diphenylpentan-5-one (2w)

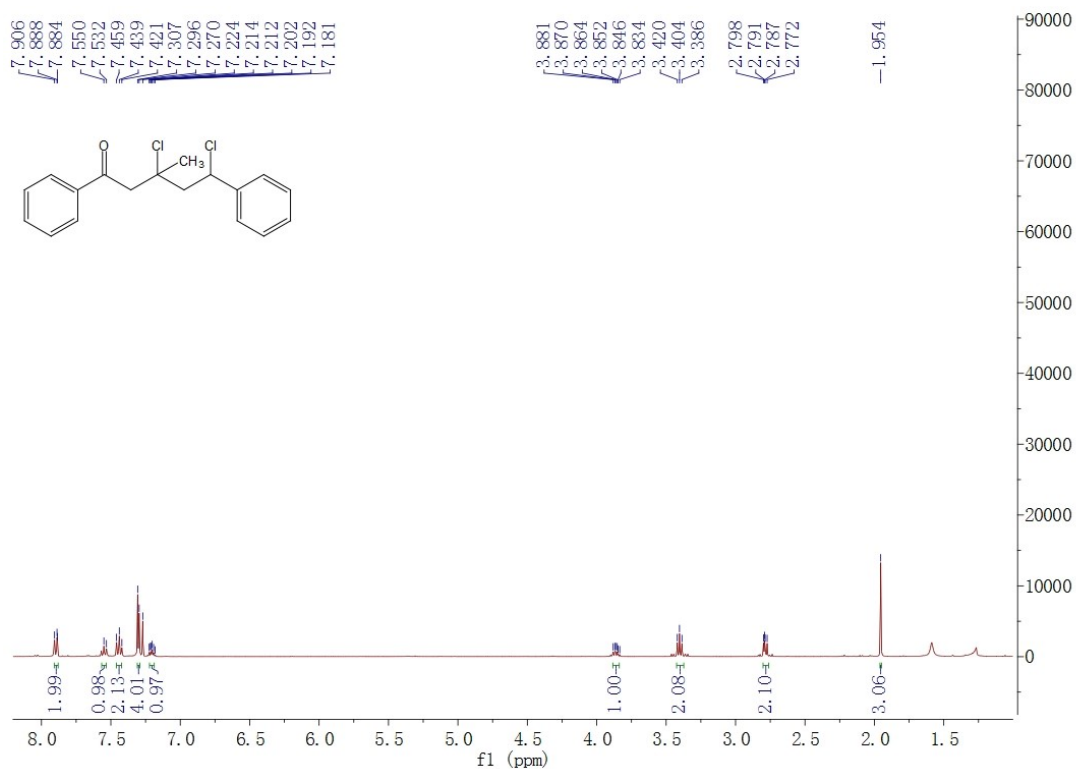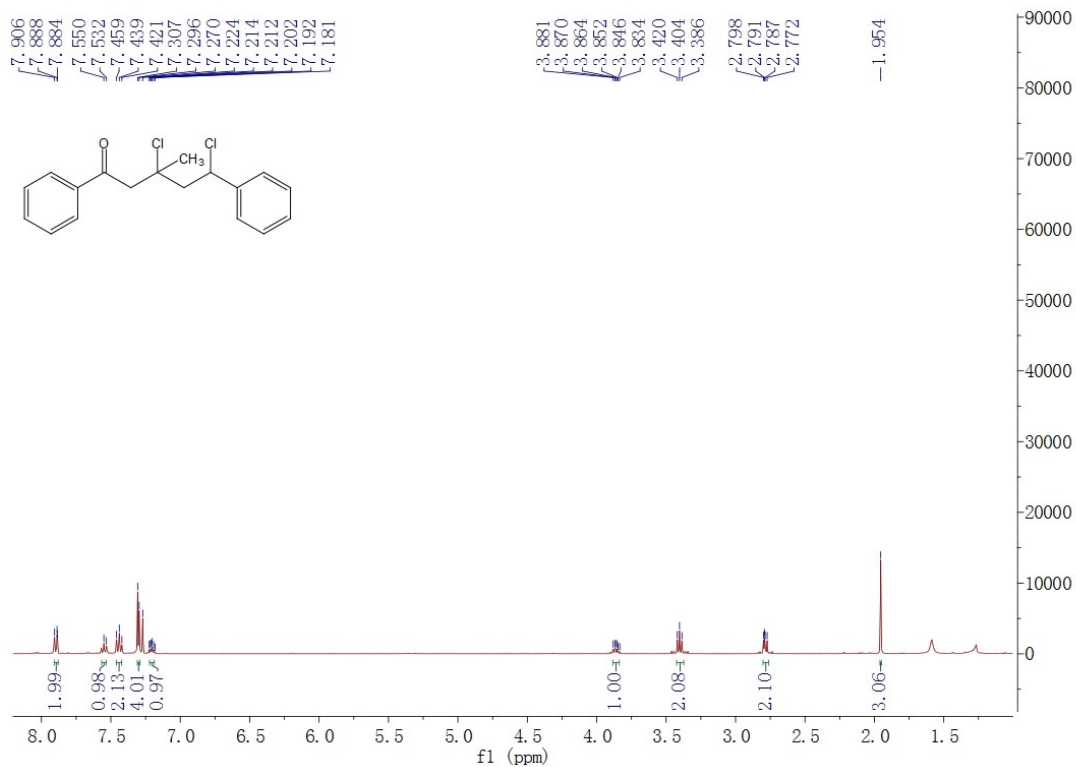

**3-deuterium-1,3-dichloro-1,5-diphenylpentan-5-one (2a')**

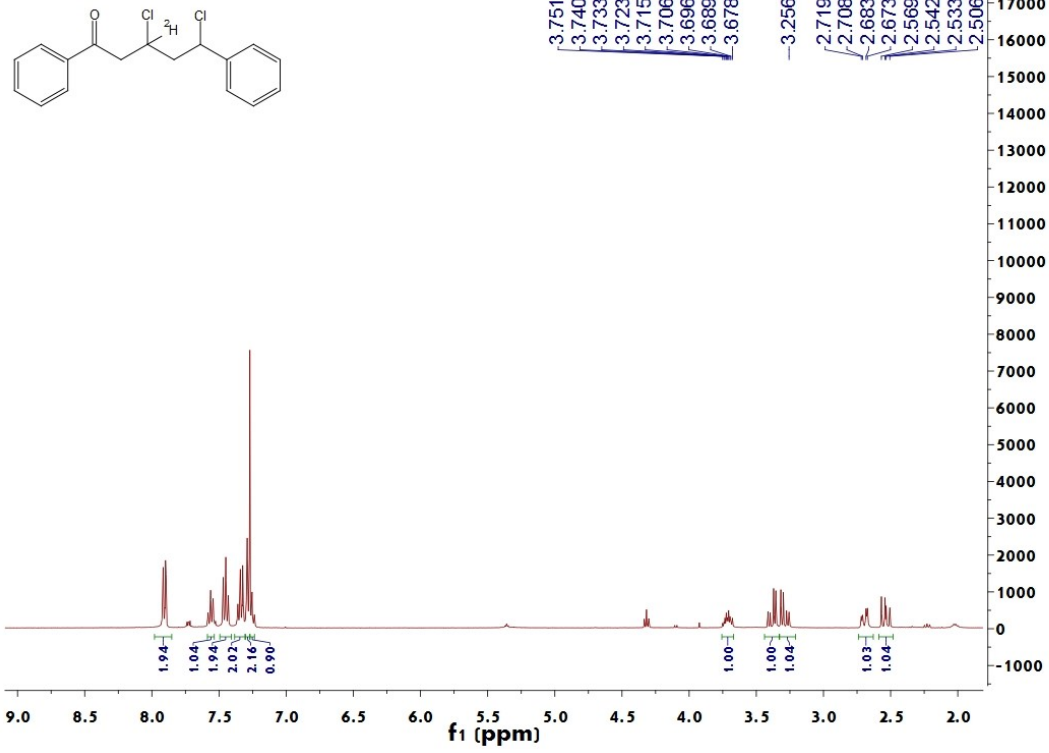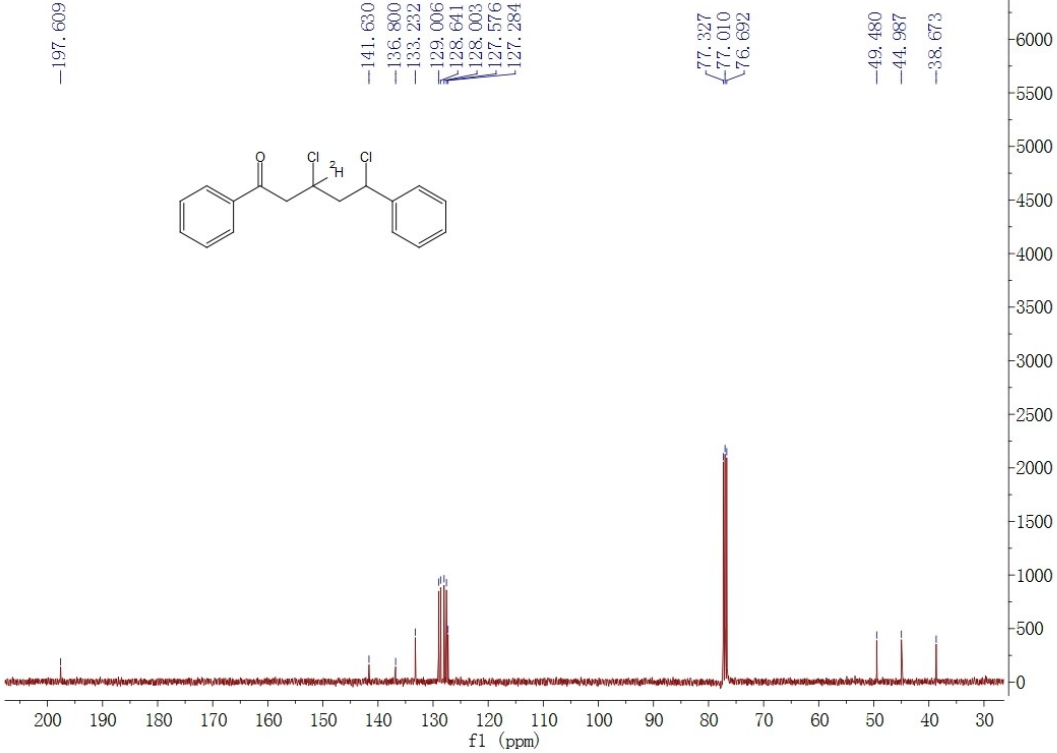



# 1-(1-(*tert*-butylperoxy)-3,3-dichloropropyl)benzene (3a)

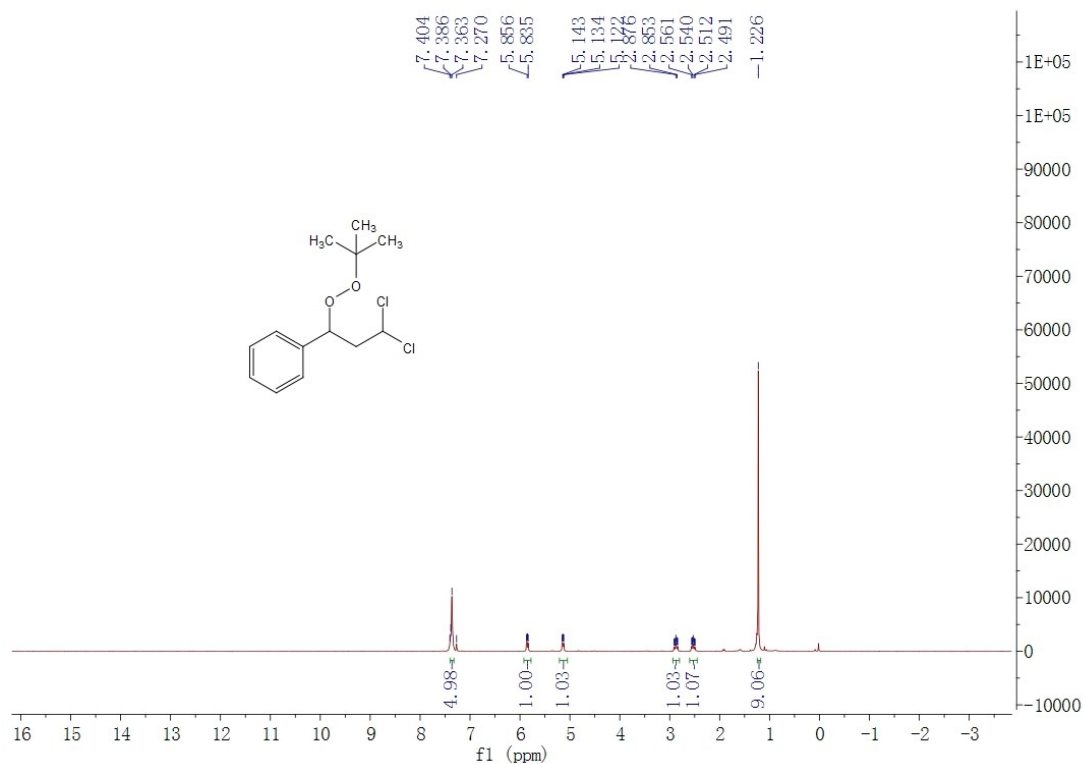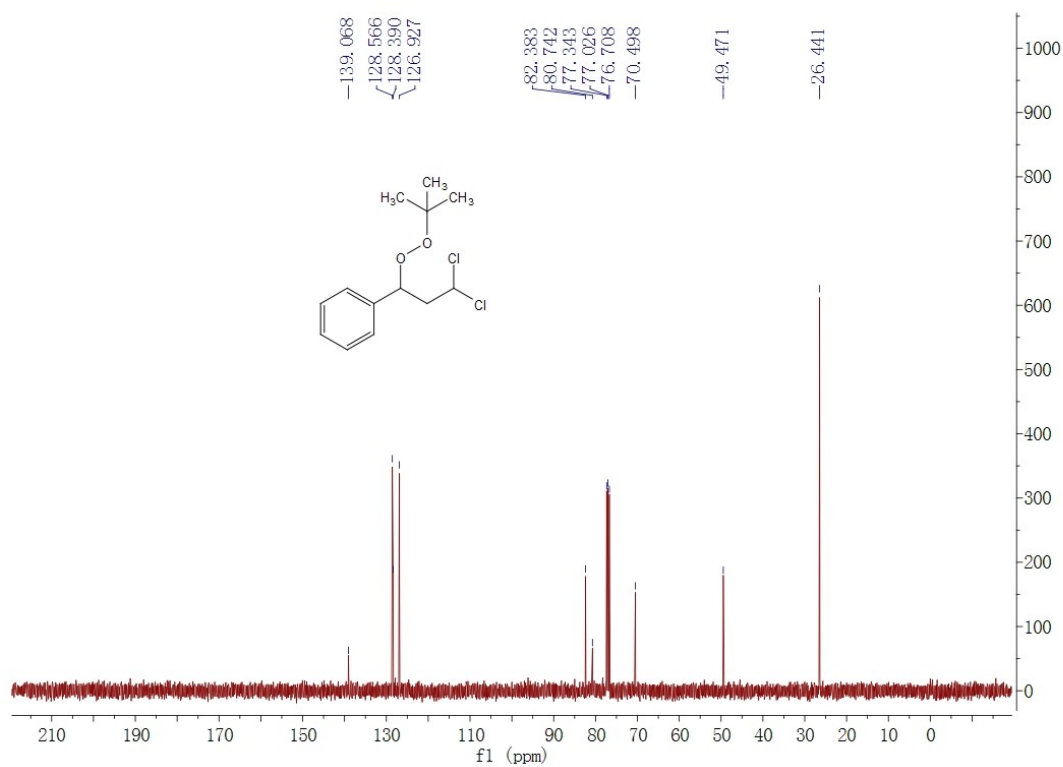

# 1-(tert-butylperoxy)-3,3-dichloro-1,1-diphenylpropane (4a)

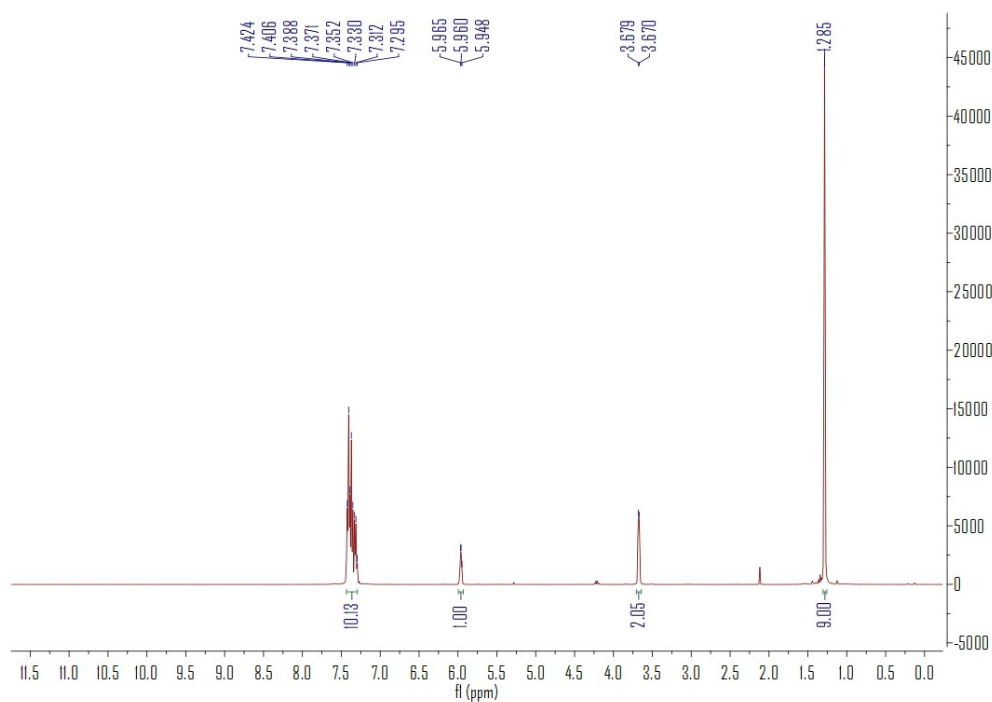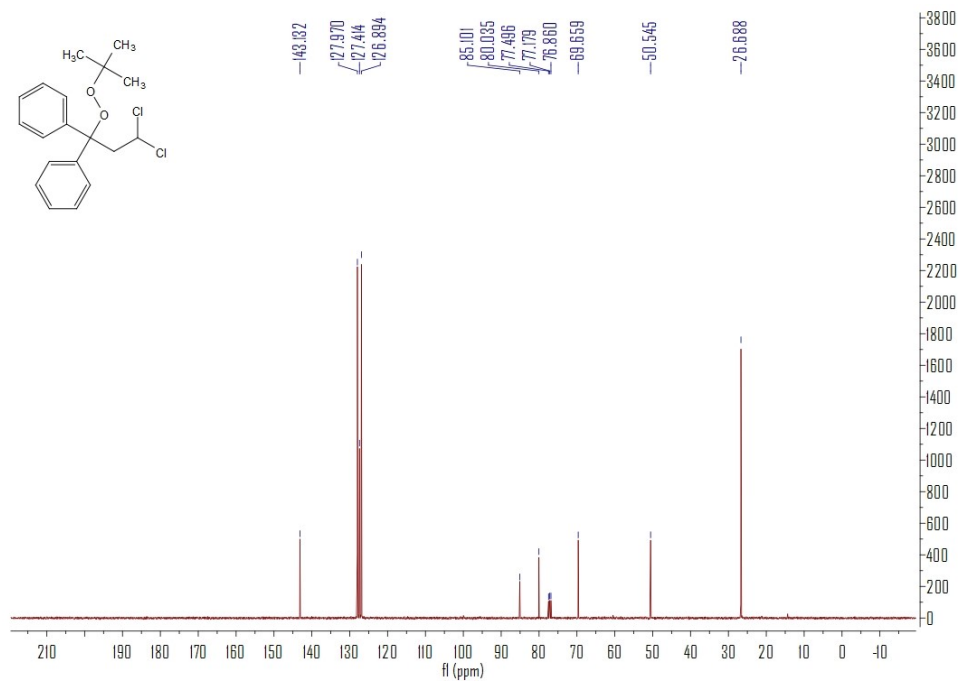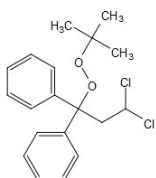

Supplement: d3ob01403g1.pdf [file d3ob01403g1.pdf]
